# Supplementary material for: A novel reactive turn-on probe capable of selective profiling and no-wash imaging of Bruton's tyrosine kinase in live cells
Source: Royal Society of Chemistry journal article supplement (doi:10.1039/c9cc01059a), 2019-01-01

## Supporting Information

### A Novel Reactive Turn-On Probe Capable of Selective Profiling and No-Wash Imaging of Bruton's Tyrosine Kinase in Live Cells

Xin Wang, Nan Ma, Rui Wu, Ke Ding, Zhengqiu Li\*

School of Pharmacy, Jinan University, Guangzhou, China 510632

\*Corresponding author (pharmlzq@jnu.edu.cn)

#### 1. General Information

All chemicals were purchased from commercial vendors and used without further purification, unless indicated otherwise. All reactions requiring anhydrous conditions were carried out under argon or nitrogen atmosphere using oven-dried glassware. AR-grade solvents were used for all reactions. Reaction progress was monitored by TLC on pre-coated silica plates (Merck 60 F<sub>254</sub> nm, 0.25 μm) and spots were visualized by UV, iodine or other suitable stains. Flash column chromatography was carried out using silica gel (Qingdao Ocean company). All NMR spectra (<sup>1</sup>H-NMR, <sup>13</sup>C-NMR) were recorded on Bruker 300 MHz/400 MHz NMR spectrometers. Chemical shifts were reported in parts per million (ppm) referenced with respect to appropriate internal standards or residual solvent peaks (CDCl<sub>3</sub> = 7.26 ppm, DMSO-*d*<sub>6</sub> = 2.50 ppm). The following abbreviations were used in reporting spectra, br s (broad singlet), s (singlet), d (doublet), t (triplet), q (quartet), m (multiplet), dd (doublet of doublets). Mass spectra were obtained on Agilent LC-ESI-MS system. All analytical HPLC were carried out on Agilent system. Water with 0.1% TFA and acetonitrile with 0.1% TFA were used as eluents and the flow rate was 0.5 mL/min. Antibodies against BTK (ab137503) were purchased from Abcam. Click reagents were purchased from Click Chemistry Tools company (<https://clickchemistrytools.com/>). The recombinant human BTK protein was purchased from Sino Biological Inc (Cat: 10578-H08B).

#### 2. Cell culture and Western blot

Cell lines were obtained from the National Cancer Institute Developmental Therapeutics Program (NCI-60). Cells were cultured in Dulbecco's modified Eagle medium (DMEM; Invitrogen, Carlsbad, CA) or RPMI 1640 Medium (Invitrogen, Carlsbad, CA) containing 10% heat-inactivated fetal bovine serum (FBS; Invitrogen), 100 units/mL penicillin, and 100 μg/mL streptomycin (Thermo Scientific) and maintained in a humidified 37 °C incubator with 5% CO<sub>2</sub>. To generate protein lysates, cells were washed twice with cold phosphate-buffered saline (PBS), harvested with 1 × trypsin or by use of a cell scraper, and collected by centrifugation. Cell pellets were then washed with PBS and lysed with RIPA (Thermo Scientific™, #89900) lysis and extraction buffer (with Pierce™ Protease Inhibitor Tablets, Thermo Scientific™, #A32955). Protein concentration was determined by Pierce™ BCA Protein Assay Kit (Thermo Scientific™, #23252) and Synergy H1 Hybrid Multi-Mode Reader (BioTek). For Western blotting experiments, samples were resolved by SDS-polyacrylamide gels and transferred to poly membranes. Membranes were then blocked with 3% bovine serum albumin (BSA) in TBST (0.1% Tween in Tris-buffered saline) for 1 h at room temperature. After blocking, membranes were incubated with the corresponding primary antibody for another 1 hour. After incubation, membranes were washed with TBST (4 × 10 min) and then incubated with an appropriate secondary antibody. Finally, blots were washed again with TBST before being developed with SuperSignal West Dura Kit (Thermo Scientific), and finally imaged with Amersham Imager 600 (GE Healthcare). Cell Counting Kit-8 (CCK-8, DOJINDO, #CK04) was used for cell proliferation assay. Proteome labeling, in-gel fluorescence scanning and cellular imaging experiments were performed as previously reported.<sup>[1-4]</sup>

### 3. Table S1. Fluorescent probes and reporter tags used in current study

|                                                                                                                                                  |                                                                                                                                                    |
|--------------------------------------------------------------------------------------------------------------------------------------------------|----------------------------------------------------------------------------------------------------------------------------------------------------|
| 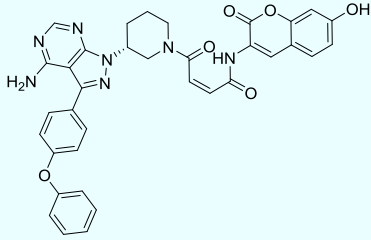 <p style="text-align: center;"><b>IB-1</b></p>                 |  <p style="text-align: center;"><b>IB-2</b></p>                  |
|  <p style="text-align: center;"><b>IB-3</b></p>                 |  <p style="text-align: center;"><b>IB-4</b></p>                  |
|  <p style="text-align: center;"><b>TAMRA-N<sub>3</sub></b></p> |  <p style="text-align: center;"><b>Biotin-N<sub>3</sub></b></p> |

**Table S2. Previously reported ibrutinib-derived probes**

|                                                                                                                                                                         |                                                                                                                                                                            |
|-------------------------------------------------------------------------------------------------------------------------------------------------------------------------|----------------------------------------------------------------------------------------------------------------------------------------------------------------------------|
| 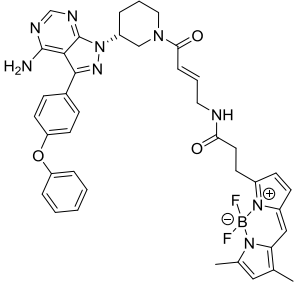 <p style="text-align: center;"><i>Bioconjugate. Chem.</i> <b>2015</b>, 26, 1513</p> |  <p style="text-align: center;"><i>Chem. Commun.</i>, <b>2014</b>, 50, 15319-15322</p> |
|  <p style="text-align: center;"><i>Chem. Commun.</i> <b>2019</b>, 55,834</p>         |  <p style="text-align: center;"><i>Sci. Rep.</i> <b>2014</b>, 4, 4782.</p>             |

## 4. Chemical Synthesis

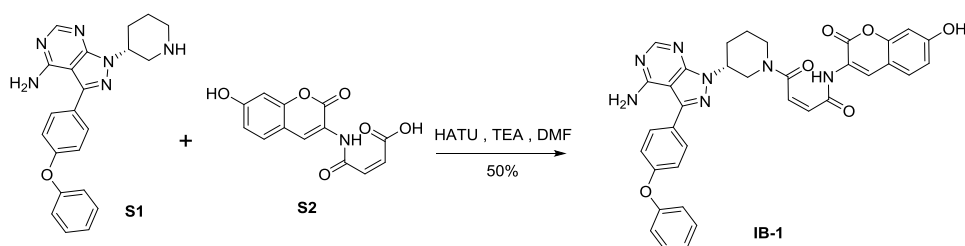

**Scheme S1**

**(IB-1).** The intermediate **S1** is commercially available and the **S2** was synthesized based on previously published procedures.<sup>[5]</sup> To a stirred solution of **S2** (28 mg, 0.1 mmol) in 5 mL DMF was added HATU (46 mg, 0.12 mmol), **S1** (39 mg, 0.1 mmol) and TEA (0.04 mL, 0.2 mmol). The reaction was stirred at room temperature overnight prior to addition of 10 mL water and then extracted with ethyl acetate ( $2 \times 10$  mL), the combined organic phase was washed with brine, dried over anhydrous  $\text{Na}_2\text{SO}_4$  and concentrated. The residue was purified by flash column (methanol: $\text{CH}_2\text{Cl}_2 = 1:50$ ) to give **IB-1** as a light yellow solid (32 mg, 50%).  $^1\text{H}$  NMR (400 MHz,  $\text{DMSO}-d_6$ )  $\delta$  10.37 (s, 1H), 10.00 (s, 0.5H), 9.95 (s, 0.5H), 8.65 (s, 0.5H), 8.62 (s, 0.5H), 8.27 (s, 0.5H), 8.08 (s, 0.5H), 7.73 – 7.52 (m, 3H), 7.48 – 7.37 (m, 2H), 7.20 – 7.07 (m, 5H), 6.80 (d,  $J = 8.8$  Hz, 1H), 6.74 (t,  $J = 2.3$  Hz, 1H), 6.62 (d,  $J = 4.9$  Hz, 1H), 6.52 (s, 1H), 4.91 – 4.71 (m, 1H), 4.60 (dd,  $J = 12.5, 4.3$  Hz, 0.5H), 4.37 (d,  $J = 12.8$  Hz, 0.5H), 3.89 (dd,  $J = 13.0, 4.2$  Hz, 0.5H), 3.73 (d,  $J = 13.0$  Hz, 0.5H), 3.56 (dd,  $J = 13.0, 10.4$  Hz, 0.5H), 3.33 (s, 2H), 3.18 (t,  $J = 11.7$  Hz, 0.5H), 3.10 (t,  $J = 12.1$  Hz, 0.5H), 2.84 (t,  $J = 12.4$  Hz, 0.5H), 2.31 – 2.16 (m, 1H), 2.16 – 2.05 (m, 1H), 1.94 – 1.77 (m, 1H), 1.76 – 1.57 (m, 1H).  $^{13}\text{C}$  NMR (101 MHz,  $\text{DMSO}-d_6$ )  $\delta$  163.32, 159.79, 158.21, 157.77, 157.11, 156.29, 155.47, 153.9, 136.29, 136.03, 130.12, 130.10, 130.01, 129.26, 126.45, 125.14, 123.77, 120.68, 118.96, 113.66, 111.35, 101.95, 97.38, 52.29, 51.97, 45.64, 44.44, 24.15, 23.26. HR-MS ( $m/z$ ) [ $\text{M} + \text{H}$ ]<sup>+</sup> calcd: 644.2252; Found: 644.2240. HPLC purity = 97.62%,  $R_t$ : 4.33 min (MeOH: $\text{H}_2\text{O} = 90:10$ ). NMR data showed that a pair of rotamers exists due to the amide bond rotation.

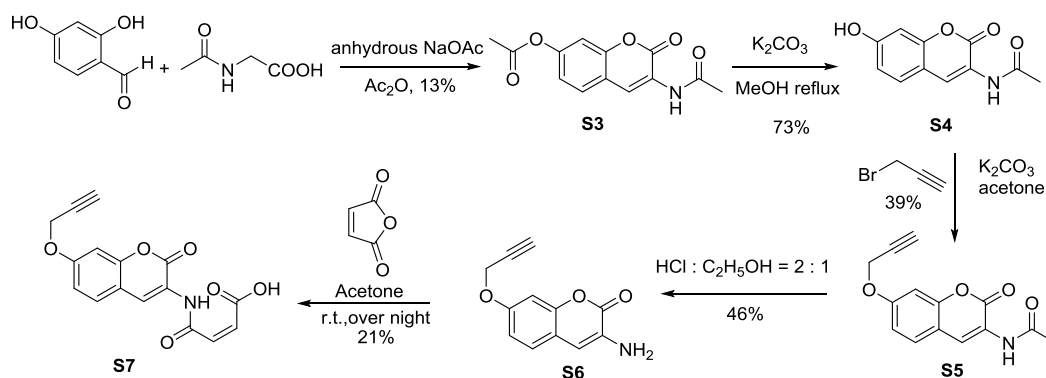

**Scheme S2**

**(S3).** A mixture of 2,4-dihydroxy benzaldehyde (5.52 g, 40 mmol), N-acetylglycine (4.68 g, 40 mmol), anhydrous sodium acetate (9.84 g, 120 mmol) in acetic anhydride (100 mL) was refluxed for 2 h. The reaction mixture was poured into ice (300 mL) to give a yellow precipitate **S3** which can be used in the next step directly (1.4 g, 13%).  $^1\text{H}$  NMR (400 MHz,  $\text{DMSO}-d_6$ )  $\delta$  9.76 (s, 1H), 8.62 (s, 1H), 7.74 (d,  $J = 8.5$  Hz, 1H), 7.26 (d,  $J = 2.2$  Hz, 1H), 7.13 (dd,  $J = 8.5, 2.2$  Hz, 1H), 2.30 (s, 3H), 2.16 (s, 3H).

**(S4).** **S3** (1.31 g, 5 mmol) and  $\text{K}_2\text{CO}_3$  (1.38 g, 15 mmol) in MeOH (25 mL) were refluxed for 2 h. The reaction mixture was evaporated, the residue was dissolved in water (25 mL), followed by acidification with 2N HCl (pH = 3), the resulting precipitate was filtered to yield a light brown solid **S4** (800 mg, 73%).  $^1\text{H}$  NMR (400 MHz,

DMSO- $d_6$ )  $\delta$  10.36 (s, 1H), 9.57 (s, 1H), 8.50 (s, 1H), 7.51 (d,  $J$  = 8.5 Hz, 1H), 6.79 (dd,  $J$  = 8.5, 2.3 Hz, 1H), 6.73 (d,  $J$  = 2.2 Hz, 1H), 2.13 (s, 3H).

(S5). To a 100 mL round-bottomed flask was added **S4** (657 mg, 3 mmol),  $K_2CO_3$  (622 mg, 4.5 mmol) and anhydrous acetone (20 mL), the resulting mixture was stirred at 60 °C for 1 h. Subsequently, 3-bromoprop-1-yne (0.388 mL, 4.5 mmol) was added to the mixture dropwisely and the mixture was stirred at 60 °C for 6 h. The reaction mixture was filtered and the solvent was removed to give a crude product. The crude product was purified by flash column (EA:PE = 1:3) to give the compound **S5** (298 mg, 39%).  $^1H$  NMR (400 MHz, DMSO- $d_6$ )  $\delta$  9.65 (s, 1H), 8.56 (s, 1H), 7.65 (d,  $J$  = 8.7 Hz, 1H), 7.06 (d,  $J$  = 2.5 Hz, 1H), 6.99 (dd,  $J$  = 8.6, 2.5 Hz, 1H), 4.92 (d,  $J$  = 2.4 Hz, 2H), 3.65 (t,  $J$  = 2.3 Hz, 1H), 2.15 (s, 3H).

(S6). The compound **S5** (100 mg, 0.39 mmol) was refluxed in a solution of HCl (37%) and ethanol (2:1) for 2 h. Subsequently, the solution was poured into ice followed by addition of 30% NaOH aqueous solution until pH is 5~6, the solution was then concentrated to get the crude product, which was further recrystallized from EtOH to give **S6** (73.8 mg, 46%).  $^1H$  NMR (400 MHz, DMSO- $d_6$ )  $\delta$  7.37 (dd,  $J$  = 8.6, 2.1 Hz, 1H), 6.97 (d,  $J$  = 2.4 Hz, 1H), 6.89 (dd,  $J$  = 8.6, 2.5 Hz, 1H), 6.72 (d,  $J$  = 2.1 Hz, 1H), 5.43 (s, 2H), 4.84 (d,  $J$  = 2.3 Hz, 2H), 3.60 (t,  $J$  = 2.4 Hz, 1H).

(S7). The mixture of **S6** (65 mg, 0.3 mmol) and maleic anhydride (36 mg, 0.36 mmol) in 5 mL acetone was stirred at room temperature overnight. After filtration, the yellow solid was washed by acetone to give product **S7** (21 mg, 21%).  $^1H$  NMR (400 MHz, DMSO- $d_6$ )  $\delta$  10.27 (s, 1H), 8.68 (s, 1H), 7.70 (d,  $J$  = 8.7 Hz, 1H), 7.08 (d,  $J$  = 2.5 Hz, 1H), 7.02 (dd,  $J$  = 8.7, 2.5 Hz, 1H), 6.62 (d,  $J$  = 12.1 Hz, 1H), 6.42 (d,  $J$  = 12.0 Hz, 1H), 4.93 (d,  $J$  = 2.4 Hz, 2H), 3.65 (q,  $J$  = 2.1 Hz, 1H). MS (ESI)  $m/z$ : 312.1[M-H] $^+$

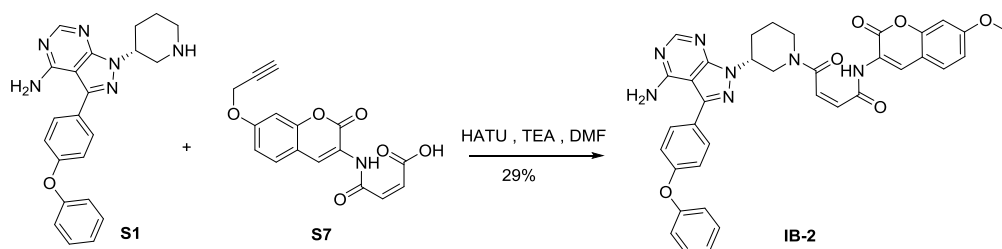

**Scheme S3**

(**IB-2**). The intermediate **S1** is commercially available. To a stirred solution of **S7** (17 mg, 0.05 mmol) in 2 mL DMF was added HATU (23 mg, 0.06 mmol), **S1** (20 mg, 0.05 mmol) and TEA (0.02 mL, 0.1 mmol). The reaction was stirred at room temperature overnight prior to addition of 5 mL water and then extracted with ethyl acetate (2  $\times$  5 mL), the combined organic phase was washed with brine, dried over anhydrous  $Na_2SO_4$  and concentrated. The residue was purified by flash column (methanol :  $CH_2Cl_2$  = 1:30) to give **IB-2** as a yellow solid (10 mg, 29%).

$^1H$  NMR (400 MHz, DMSO- $d_6$ )  $\delta$  10.08 (s, 0.5H), 10.03 (s, 0.5H), 8.71 (s, 0.5H), 8.68 (s, 0.5H), 8.27 (s, 0.5H), 8.09 (s, 0.5H), 7.77 – 7.65 (m, 2H), 7.61 (d,  $J$  = 8.6 Hz, 1H), 7.42 (q,  $J$  = 8.1 Hz, 2H), 7.21 – 7.08 (m, 5H), 7.06 (t,  $J$  = 2.9 Hz, 1H), 7.00 (d,  $J$  = 8.6 Hz, 1H), 6.65 (d,  $J$  = 3.1 Hz, 1H), 6.54 (d,  $J$  = 1.6 Hz, 1H), 4.92 (s, 2H), 4.88 – 4.71 (m, 1H), 4.61 (d,  $J$  = 8.6 Hz, 0.5H), 4.37 (d,  $J$  = 12.7 Hz, 0.5H), 3.90 (d,  $J$  = 9.4 Hz, 0.5H), 3.74 (d,  $J$  = 12.6 Hz, 0.5H), 3.64 (q,  $J$  = 2.2 Hz, 1H), 3.61 – 3.52 (m, 0.5H), 3.23 – 3.16 (m, 0.5H), 3.10 (t,  $J$  = 11.7 Hz, 0.5H), 2.84 (t,  $J$  = 11.3 Hz, 0.5H), 2.35 – 2.17 (m, 1H), 2.17 – 2.03 (m, 1H), 1.96 – 1.76 (m, 1H), 1.77 – 1.51 (m, 1H).  $^{13}C$  NMR (101 MHz, DMSO- $d_6$ )  $\delta$  163.47, 158.70, 157.57, 157.11, 156.28, 155.67, 153.96, 151.16, 136.46, 136.23, 130.11, 130.09, 130.0, 129.03, 127.83, 125.41, 125.12, 123.77, 121.94, 118.96, 113.30, 101.61, 97.39, 78.84, 78.61, 56.06, 52.30, 49.85, 44.46, 23.27. HR-MS ( $m/z$ ) [M + H] $^+$  calcd: 682.2409; Found: 682.2396. HPLC purity = 100%, Rt: 4.79 min (MeOH :  $H_2O$  = 90 : 10). NMR data showed that a pair of rotamers exists due to the amide bond rotation.

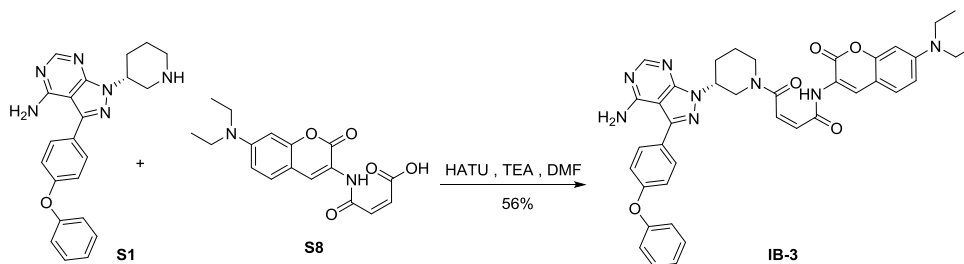

**Scheme S4**

**(IB-3).** The intermediate **S1** is commercially available and the **S8** was synthesized based on previously published procedures.<sup>[6]</sup> To a stirred solution of **S8** (33 mg, 0.1 mmol) in 5 mL DMF was added HATU (46 mg, 0.12 mmol), **S1** (39 mg, 0.1 mmol) and TEA (0.03 mL, 0.2 mmol). The reaction was stirred at room temperature overnight prior to addition of 3 mL water and then extracted with ethyl acetate (2 × 5 mL), the combined organic phase was washed with brine, dried over anhydrous Na<sub>2</sub>SO<sub>4</sub> and concentrated. The residue was purified by flash column (methanol:CH<sub>2</sub>Cl<sub>2</sub> = 1:50) to give **IB-3** as a yellow solid (39 mg, 56%). <sup>1</sup>H NMR (400 MHz, DMSO-*d*<sub>6</sub>) δ 9.89 (s, 0.5H), 9.83 (s, 0.5H), 8.59 (s, 0.5H), 8.54 (s, 0.5H), 8.27 (s, 0.5H), 8.10 (s, 0.5H), 7.69 (d, *J* = 8.6 Hz, 1H), 7.61 (d, *J* = 8.6 Hz, 1H), 7.51 – 7.38 (m, 3H), 7.21 – 7.07 (m, 5H), 6.70 (d, *J* = 8.9 Hz, 1H), 6.59 (d, *J* = 3.2 Hz, 1H), 6.53 (t, *J* = 2.9 Hz, 1H), 6.49 (d, *J* = 2.7 Hz, 1H), 4.83 (m, 1H), 4.60 (dd, *J* = 12.5, 4.4 Hz, 0.5H), 4.37 (dd, *J* = 10.2, 6.7 Hz, 0.5H), 3.90 (dd, *J* = 13.2, 4.2 Hz, 0.5H), 3.74 (d, *J* = 13.2 Hz, 0.5H), 3.57 (dd, *J* = 13.0, 10.4 Hz, 0.5H), 3.40 (q, *J* = 5.7, 5.0 Hz, 4H), 3.18 (t, *J* = 11.7 Hz, 0.5H), 3.09 (t, *J* = 11.6 Hz, 0.5H), 2.83 (t, *J* = 12.2 Hz, 0.5H), 2.30 – 2.17 (m, 1H), 2.16 – 2.04 (m, 1H), 1.94 – 1.76 (m, 1H), 1.76 – 1.58 (m, 1H), 1.14 – 1.06 (m, 6H). <sup>13</sup>C NMR (101 MHz, DMSO-*d*<sub>6</sub>) δ 163.03, 158.21, 158.13, 156.29, 155.67, 153.96, 152.71, 149.27, 135.84, 135.58, 130.11, 130.08, 130.00, 128.98, 127.91, 127.59, 125.29, 123.76, 118.95, 118.38, 109.48, 107.44, 97.38, 96.58, 52.29, 51.97, 49.85, 43.99, 24.14, 23.27, 12.31. HR-MS (*m/z*) [*M* + *H*]<sup>+</sup> calcd: 699.3038; Found: 699.3026. HPLC purity = 100%, Rt: 17.95 min (MeOH:H<sub>2</sub>O = 80:20). NMR data showed that a pair of rotamers exists due to the amide bond rotation.

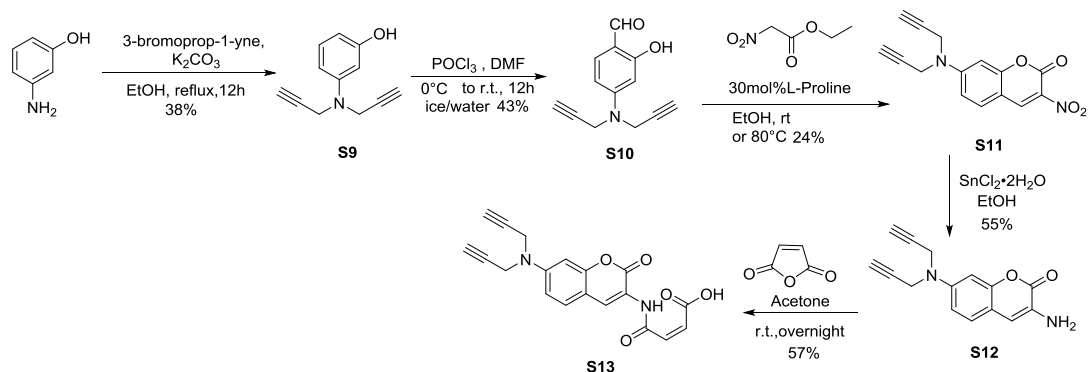

**Scheme S5**

**(S9).** To a solution of 3-aminophenol (11 g, 100 mmol) in 500 mL ethanol was added 3-bromoprop-1-yne (34.4 mL, 400 mmol), potassium carbonate (28 g, 200 mmol) and refluxed for 3 h. Upon completion of the reaction, the reaction mixture was extracted with ethyl acetate and water. The organic layer was dried with anhydrous Mg<sub>2</sub>SO<sub>4</sub> and evaporated. The product **S9** (7.3 g, 38%) was purified by flash column (PE:EA = 50:1). <sup>1</sup>H NMR (400 MHz, DMSO-*d*<sub>6</sub>) δ 9.18 (s, 1H), 7.00 (t, *J* = 8.1 Hz, 1H), 6.36 (dd, *J* = 7.9, 2.1 Hz, 1H), 6.32 (t, *J* = 2.3 Hz, 1H), 6.23 (dd, *J* = 7.9, 1.5 Hz, 1H), 4.06 (d, *J* = 2.4 Hz, 4H), 3.15 (t, *J* = 2.3 Hz, 2H).

**(S10).** POCl<sub>3</sub> (3.26 mL, 35 mM) was added slowly to anhydrous DMF (30 mL) and stirred for 30 min. After that compound **S9** (6.5 g, 35 mmol) in DMF (10 mL) was added dropwisely. The mixture was slowly warmed to room temperature and stirred overnight. The reaction solution was poured into ice and stirred for a few minutes and then

filtered to give **S10** (3.17 g, 43%) as a brown solid.  $^1\text{H NMR}$  (400 MHz,  $\text{DMSO-}d_6$ )  $\delta$  9.82 (s, 1H), 7.55 (d,  $J = 8.9$  Hz, 1H), 6.53 (dd,  $J = 8.9, 2.4$  Hz, 1H), 6.32 (d,  $J = 2.4$  Hz, 1H), 4.28 (d,  $J = 2.5$  Hz, 4H), 3.27 – 3.24 (m, 2H).

(**S11**). To the solution of **S10** (2.13 g, 10 mmol) and ethyl nitroacetate (1.1 mL, 10 mmol) in 50 mL ethanol was added L-proline (30 mol %). After completion of the reaction (monitored by TLC), the solvent was evaporated and the product was dissolved in 20 mL  $\text{CHCl}_3$  and then washed with water ( $3 \times 20$  mL). The organic layer was washed with 20 mL brine, dried over anhydrous  $\text{Na}_2\text{SO}_4$  and evaporated under reduced pressure. The product **S11** (675 mg, 24%) was recrystallized from ethanol.  $^1\text{H NMR}$  (400 MHz,  $\text{DMSO-}d_6$ )  $\delta$  9.14 (s, 1H), 7.87 (d,  $J = 9.0$  Hz, 1H), 7.07 (dd,  $J = 9.0, 2.4$  Hz, 1H), 6.86 (d,  $J = 2.4$  Hz, 1H), 4.45 (d,  $J = 2.5$  Hz, 4H), 3.32 (t,  $J = 2.4$  Hz, 2H).

(**S12**). To a 10 mL round-bottomed flask was added  $\text{SnCl}_2 \cdot 2\text{H}_2\text{O}$  (3.38 g, 15 mmol), 20 mL 37% HCl, and compound **S11** (564 mg, 2 mmol). The resulting solution was further stirred at room temperature for 6 h. After that, a solution of 5 M NaOH was added followed by extraction with ethyl acetate. The organic layer was dried with anhydrous  $\text{Na}_2\text{SO}_4$  and evaporated. The crude product was obtained as a brown solid (139 mg, 55%) which was used in the next step directly.  $^1\text{H NMR}$  (400 MHz,  $\text{DMSO-}d_6$ )  $\delta$  7.30 (d,  $J = 8.6$  Hz, 1H), 6.93 – 6.76 (m, 2H), 6.71 (s, 1H), 5.27 (s, 2H), 4.20 (d,  $J = 2.5$  Hz, 4H), 3.26 – 3.13 (m, 2H).

(**S13**). The mixture of **S12** (126 mg, 0.5 mmol) and maleic anhydride (59 mg, 0.6 mmol) in 8 mL acetone was stirred at room temperature overnight. After filtration, the yellow solid was washed by acetone to give product **S13** (100 mg, 57%).  $^1\text{H NMR}$  (400 MHz,  $\text{DMSO-}d_6$ )  $\delta$  12.99 (s, 1H), 10.19 (s, 1H), 8.62 (s, 1H), 7.60 (d,  $J = 8.8$  Hz, 1H), 6.96 (dd,  $J = 8.8, 2.5$  Hz, 1H), 6.85 (d,  $J = 2.5$  Hz, 1H), 6.63 (d,  $J = 12.1$  Hz, 1H), 6.41 (d,  $J = 12.0$  Hz, 1H), 4.30 (d,  $J = 2.5$  Hz, 4H), 3.23 (t,  $J = 2.3$  Hz, 2H).  $^{13}\text{C NMR}$  (101 MHz,  $\text{DMSO-}d_6$ )  $\delta$  167.87, 163.60, 157.88, 151.72, 148.85, 132.48, 128.67, 128.56, 126.65, 120.3, 111.95, 110.13, 100.24, 79.52, 75.37. MS (ESI)  $m/z$ : 349.1 $[\text{M-H}]^+$

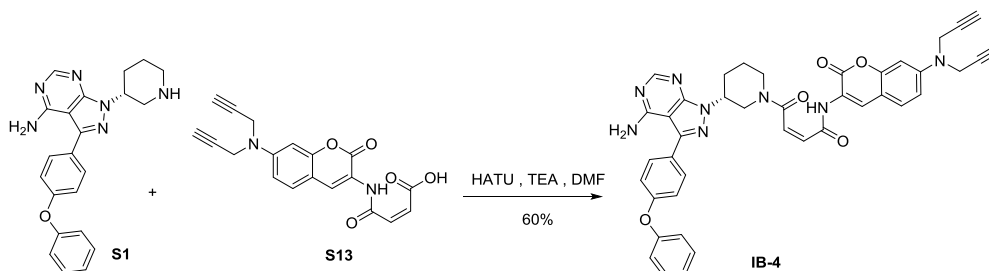

**Scheme S6**

(**IB-4**). The intermediate **S1** is commercially available. To a stirred solution of **S13** (11 mg, 0.03 mmol) in 2 mL DMF was added HATU (14 mg, 0.036 mmol), **S1** (12 mg, 0.03 mmol) and TEA (0.01 mL, 0.06 mmol). The reaction was stirred at room temperature overnight prior to addition of 3 mL water and then extracted with ethyl acetate ( $2 \times 5$  mL), the combined organic phase was washed with brine, dried over anhydrous  $\text{Na}_2\text{SO}_4$  and concentrated. The residue was purified by flash column (methanol: $\text{CH}_2\text{Cl}_2 = 1:50$ ) to give **IB-4** as a yellow solid (13 mg, 60%).  $^1\text{H NMR}$  (400 MHz,  $\text{DMSO-}d_6$ )  $\delta$  10.02 (s, 0.5H), 9.97 (s, 0.5H), 8.67 (s, 0.5H), 8.64 (s, 0.5H), 8.28 (s, 0.5H), 8.10 (s, 0.5H), 7.69 (d,  $J = 8.7$  Hz, 1H), 7.67 – 7.57 (m, 2H), 7.49 – 7.37 (m, 2H), 7.23 – 7.08 (m, 5H), 6.95 (dd,  $J = 8.7, 2.5$  Hz, 1H), 6.85 (t,  $J = 2.4$  Hz, 1H), 6.62 (d,  $J = 3.0$  Hz, 1H), 6.52 (d,  $J = 1.7$  Hz, 1H), 4.93 – 4.72 (m, 1H), 4.60 (dd,  $J = 12.5, 4.4$  Hz, 0.5H), 4.37 (d,  $J = 12.8$  Hz, 0.5H), 4.29 (s, 4H), 3.90 (d,  $J = 10.1$  Hz, 0.5H), 3.74 (d,  $J = 12.9$  Hz, 0.5H), 3.56 (dd,  $J = 13.1, 10.4$  Hz, 0.5H), 3.22 (q,  $J = 2.3$  Hz, 2H), 3.17 (d,  $J = 11.7$  Hz, 0.5H), 3.10 (t,  $J = 11.6$  Hz, 0.5H), 2.84 (t,  $J = 11.7$  Hz, 0.5H), 2.32 – 2.18 (m, 1H), 2.12 (dd,  $J = 13.0, 3.9$  Hz, 1H), 1.94 – 1.76 (m, 1H), 1.76 – 1.58 (m, 1H).  $^{13}\text{C NMR}$  (101 MHz,  $\text{DMSO-}d_6$ )  $\delta$  163.25, 157.87, 157.10, 156.29, 153.96, 151.60, 148.74, 143.23, 136.17, 135.95, 130.12, 130.10, 130.02, 128.60, 126.37, 125.19, 123.77, 120.36, 118.96, 111.89, 110.17, 100.20, 97.38, 79.42, 75.27, 54.91, 52.27, 51.97, 44.45, 24.15, 23.27. HR-MS ( $m/z$ )  $[\text{M} +$

$HJ^+$  calcd: 719.2725; Found: 719.2691. HPLC purity = 99.61%, Rt: 9.88 min (MeOH : H<sub>2</sub>O = 90:10). NMR data showed that a pair of rotamers exists due to the amide bond rotation.

## 5. The reaction mechanism between the probe and BTK.

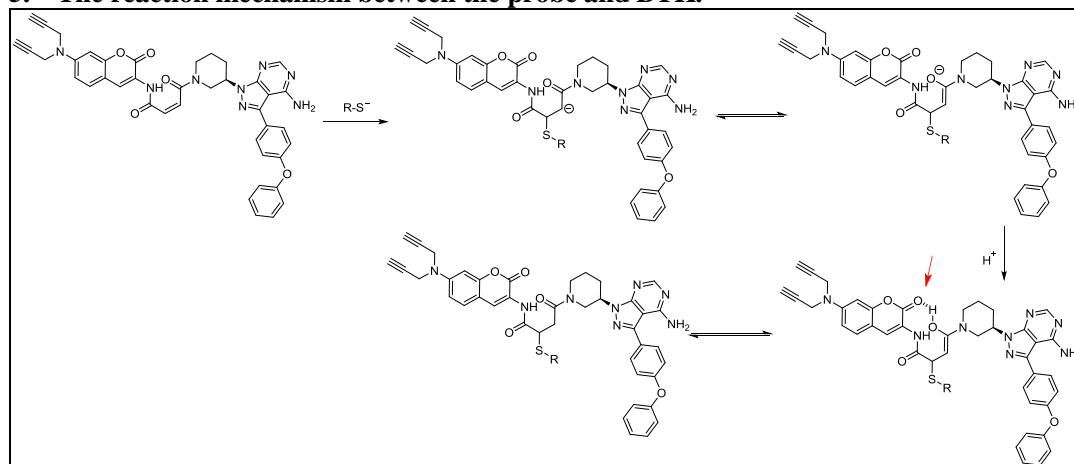

Figure S1. Proposed reaction mechanism between the probe and BTK protein, an intramolecular hydrogen bond was formed in the intermediate (red arrow indicated).

## 6. *In Vitro* Enzymatic Activity Assay and Cell Growth Inhibition Assay<sup>[7]</sup>

All the probes were evaluated with the BTK kinase inhibition using Z'-LYTE™ fluorescence resonance energy transfer (FRET) method, ibrutinib was used as the reference compounds. The Z'-LYTE™ biochemical assay employs a FRET-based, coupled-enzyme format and is based on the differential sensitivity of phosphorylated and non-phosphorylated peptides to proteolytic cleavage. The peptide substrate is labeled with two fluorophores-one at each end-that make up a FRET pair. The compounds were diluted three-fold from  $5.1 \times 10^{-9}$  M to  $1 \times 10^{-4}$  M in DMSO. Plate was measured on EnVision Multilabel Reader (Perkin Elmer). Curve fitting and data presentations were performed using Graph Pad Prism version 4.0. Cytotoxicity assays were carried out using Raji cells by CCK-8 assay. 9000 cells per well were seeded in a 96-well plate (100  $\mu$ L medium/well) and incubated in a humidified incubator for adherence. The probes and parent inhibitors in DMSO were added to cells at the final concentrations (DMSO never exceeded 1%) of 100, 50, 25, 12.5, 6.25, 3.12, 1.56, 0.78, 0.39 and 0.19  $\mu$ M and further incubated for 48 h. CCK-8 reagent (10  $\mu$ L) was added to each well and incubated for 2 h. Following that, the absorbance was measured at 450 nm and 650 nm on a plate reader (Synergy HI, BioTek Instruments, Inc. Vermont, US). Cell viability rate was determined as  $VR = (A - A_0)/(A_s - A_0) \times 100\%$ , where A is the absorbance of the experimental group, A<sub>s</sub> is the absorbance of the control group (DMSO was used as the control) and A<sub>0</sub> is the absorbance of the blank group (no cells). IC<sub>50</sub> values were calculated using GraphPad Prism

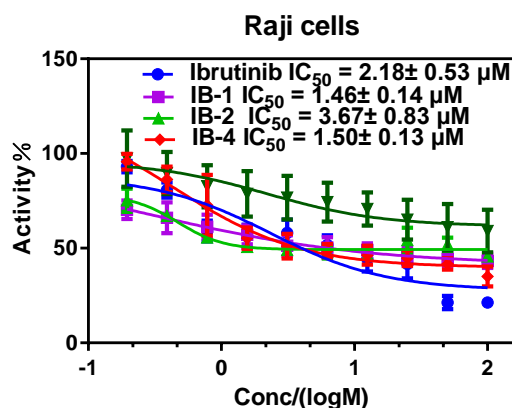

Figure S2. IC<sub>50</sub> values of IB-1/2/3/4 against Raji cancer cells.

## 7. Fluorescent Properties Measurements

For the measurement of fluorescence turn-on, purified recombinant BTK, BSA, Cys and GSH were diluted to the desired concentrations in PBS buffer (50  $\mu$ L). Subsequently, **IB-1/2/3/4** in DMSO (1  $\mu$ M final concentration) was added to the mixture. The fluorescence intensity was monitored and recorded by EnVision Multilabel Reader (Perkin Elmer) (Ex = 405 nm, Em = 475 nm) using OptiPlate™ –384F at 25  $^{\circ}$ C. For competition experiments, the competitor ibrutinib was diluted to desired concentrations in PBS (50  $\mu$ L) and pre-incubated with BTK at room temperature for 30 min, **IB-4** was then added. Probe **IB-4** in DMSO (1  $\mu$ L) was added to PBS buffer (50  $\mu$ L) as a control (final probe concentration is 1  $\mu$ M **IB-4** with 0.5  $\mu$ M BTK), the emission spectra of the reaction system was recorded by EnVision Multilabel Reader (Perkin Elmer) (Ex = 405 nm, Em = 475 nm) at different time points (0 min, 5min, 10 min, 30 min, 60 min).

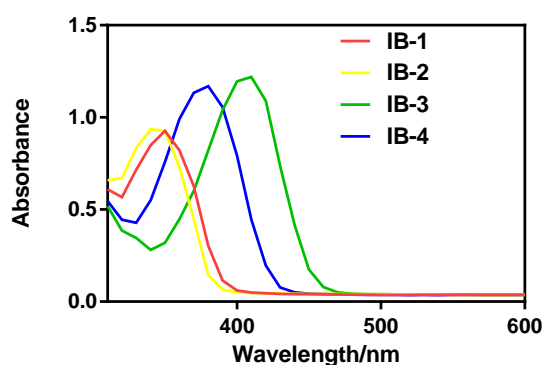

Figure S3. Absorbance spectra of **IB-1/IB-2/IB-3/IB-4** in the presence of recombinant BTK protein.

## 8. In Vitro and In Situ Proteome Labeling

For gel-based recombinant protein labeling, **IB-4** (1  $\mu$ M final probe concentration) was incubated with purified BTK protein at different final concentrations in PBS buffer for 30 min at 37  $^{\circ}$ C with gentle shaking. Subsequently, the labeled proteins were subjected to click reaction with TAMRA-azide under standard click chemistry conditions (20  $\mu$ M TAMRA-N<sub>3</sub> from 1 mM stock solution in DMSO, 50  $\mu$ M THPTA from 2.5 mM freshly prepared stock solution in DMSO, 0.5 mM TCEP from 25 mM freshly prepared stock solution in deionized water, and 0.5 mM CuSO<sub>4</sub> from 25 mM freshly prepared stock solution in deionized water). After 2 h, 2 $\times$ SDS loading dye was added and the mixture was heated to 90  $^{\circ}$ C for 2-5 min. The resulting proteins were resolved by SDS-PAGE. In-gel fluorescence scanning was used to visualize the labeled protein bands. Both in-gel fluorescence scanning (FL) and coomassie staining (CBB) were always carried out on the gels upon SDS-PAGE separation of labeled samples.

For in situ proteome labeling, cells were grown to 80–90% confluency in 6-well plates under conditions as described above. The medium was removed and washed twice with PBS and then treated with 2 mL probe-containing medium in the presence or absence of excessive competitors (diluted from DMSO stocks whereby DMSO never exceeded 1% in the final solution). After 2-5 h of incubation, the medium was aspirated and cells were washed twice with PBS to remove excessive probe. The cells were lysed with 200  $\mu$ L RIPA lysis buffer (Thermo Scientific™ #89900) containing phosphatase inhibitor (Thermo Scientific™ #88669) on ice for 30 min. A soluble protein solution was obtained by centrifugation for 10 min (14000 rpm, 4  $^{\circ}$ C). Eventually, the protein concentrations were determined by using the BCA protein assay (Pierce™ BCA protein assay kit) and diluted to 1 mg/mL with PBS. A freshly pre-mixed click chemistry reaction cocktail (20  $\mu$ M TAMRA-N<sub>3</sub> from 1mM stock solution in DMSO, 50  $\mu$ M THPTA from 2.5 mM freshly prepared stock solution in DMSO, 0.5 mM TCEP from 25 mM freshly prepared stock solution in deionized water, and 0.5 mM CuSO<sub>4</sub> from 25 mM freshly prepared stock solution in deionized water) was added to the labeled proteome. The reaction was further incubated for 2 h prior to addition of pre-chilled acetone (-20  $^{\circ}$ C). The precipitated proteins were subsequently collected by centrifugation



(14000 rpm, 10 min at 4 °C), and washed with 200  $\mu$ L of prechilled methanol. The samples were dissolved in 1 $\times$ SDS loading buffer and heated for 10 min at 95 °C. 20  $\mu$ g proteins for each lane were loaded on SDS-PAGE (10% gel) and then visualized by in-gel fluorescence scanning (Typhoon FLA 9500).

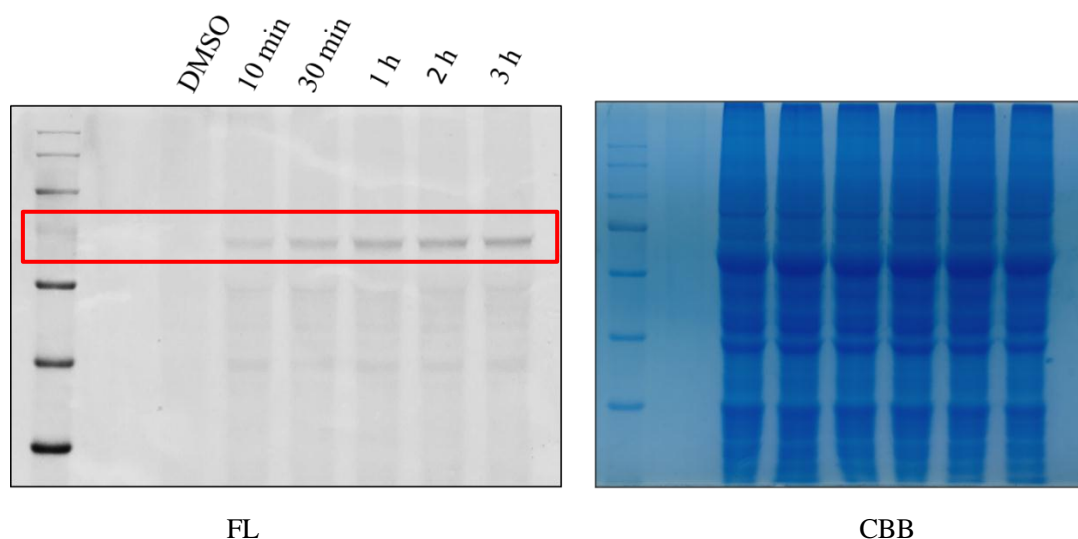

Figure S4. Time-dependent labelling profiles of **IB-4** (1  $\mu$ M ) and with Namalwa cells.

## 9. Pull down and Targets Validation

To identify the interacting cellular targets of **IB-4**, pull-down (PD) experiments were carried out, and followed by Western blotting (WB) and LC-MS/MS, where applicable. The general pull-down experiments were based on previously reported procedures,<sup>[1-4]</sup> with the following optimizations. Namalwa and Toledo cells were grown to 80–90% confluency under the conditions described above. The medium was removed and the cells were treated with probe-containing medium in the presence or absence of corresponding competitors. After 3 h of incubation, the medium was aspirated, and cells were washed twice with PBS to remove excessive probe. The cells were lysed with RIPA buffer and centrifuged for 10 min (14000 rpm, 4 °C) to get a soluble protein solution. Eventually, the protein concentrations were determined by BCA protein assay and then diluted to 1 mg/mL with PBS. A freshly premixed click chemistry reaction cocktail was added (20  $\mu$ M Biotin- $N_3$  from 1 mM stock solution in DMSO, 50  $\mu$ M THPTA from 2.5 mM freshly prepared stock solution in DMSO, 0.5 mM TCEP from 25 mM freshly prepared stock solution in deionized water, and 0.5 mM  $CuSO_4$  from 25 mM freshly prepared stock solution in deionized water). The reaction was further incubated for 2 h with gentle mixing prior to precipitation by addition of pre-chilled acetone (–20 °C). Precipitated proteins were subsequently collected by centrifugation (13000 rpm, 10 min at 4 °C) and dissolved in PBS containing 1% SDS. Upon incubation with streptavidin beads for 4 hours at rt, the beads were washed with PBS containing 0.5% SDS (3  $\times$  1 mL) and PBS (3  $\times$  1 mL). The enriched proteins was eluted by 1  $\times$  loading buffer at 95 °C for 10 min and separated by SDS-PAGE (10%). Control pull-down experiments using the DMSO or in the presence of competitors were carried out concurrently with live cells. Western blotting experiments were carried out as previously described using the corresponding antibodies.

Subsequently, beads were resuspended in 500  $\mu$ L 6 M urea in PBS, 25  $\mu$ L of 200 mM DTT in 25 mM  $NH_4HCO_3$  buffer was added and the reaction was incubated for 37 °C for 30 min. For alkylation, 25  $\mu$ L of 500 mM IAA in 25 mM  $NH_4HCO_3$  buffer was added and incubated for 30 min at room temperature in dark. Then, remove supernatant and wash bead by 1 mL PBS once. For the digestion, 150  $\mu$ L 2 M urea in PBS, 150  $\mu$ L 1 mM  $CaCl_2$  in 50 mM  $NH_4HCO_3$  and 1  $\mu$ g of trypsin were added. The reaction was incubated at 37 °C overnight. The supernatants containing the digested peptides were collected, desalted with Waters C18 Tips and dried by vacuum centrifugation. The peptides were separated and analyzed on an Easy-nLC 1200 nano-HPLC system coupled to an

Orbitrap Fusion Lumos mass spectrometer (both - Thermo Fisher Scientific, USA). The raw data were processed and searched with MaxQuant.

## 10. Cellular Imaging

To validate the utility of the probes for imaging of potential cellular targets, fluorescence microscopy was further performed. The general procedures were similar to what was previously reported.<sup>[1-4]</sup> For no-wash imaging in live-cells, Namalwa and Jurkat cells seeded in glass bottom dishes and grown until 70–80% confluency. The cells were treated with 0.2 mL medium (1640 for Namalwa and Jurkat cells, IMDM for Toledo cells) with 1  $\mu$ M **IB-3/4**, DMSO was performed as a control, and then imaged directly. For immunofluorescence (IF) experiments, after live-cell imaging, the cells were fixed for 1 h at room temperature with 3.7% formaldehyde in PBS, washed twice with cold PBS again, and permeabilized with 0.1% Triton X-100 in PBS for 30 min. Cells were then blocked with 2-5% BSA in PBS for 30 min, washed twice with PBS, and further incubated with anti-BTK (1:100 dilution) for 1 h at room temperature, washed twice with PBS, and then incubated with goat anti-rabbit IgG H&L (Alexa Fluor® 488, 1:500 dilution) for 1 h, following by washing again with PBS before imaging. All imaging data were collected on a Zeiss LSM880 NLO (2+1 with BIG) Confocal Microscope System.

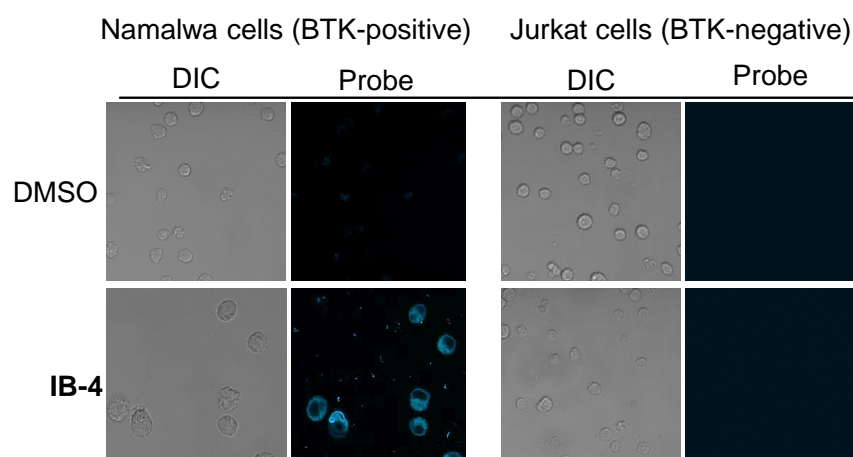

Figure S5. Cellular imaging of IB-4 with BTK-positive and BTK-negative cells.

## References

- [1] K. Cheng, J. S. Lee, P. Hao, S. Q. Yao, K. Ding, Z. Li. *Angew. Chem. Int. Ed.* **2017**, *56*, 15044-15048.
- [2] H. Guo, J. Xu, P. Hao, K. Ding, Z. Li, *Chem. Commun.* **2017**, *53*, 9620-9623.
- [3] Z. Li, D. Wang, L. Li, S. Pan, Z. Na, C. Y. Tan and S. Q. Yao, *J. Am. Chem. Soc.*, **2014**, *136*, 9990-9998.
- [4] Z. Li, L. Qian, L. Li, J. C. Bernhammer, H. V. Huynh, J. S. Lee and S. Q. Yao, *Angew. Chem. Int. Ed.* **2016**, *55*, 2002–2006.
- [5] L. Yi, H. Li, L. Sun, L. Liu, C. Zhang, and Z. Xi. *Angew. Chem. Int. Ed.* **2009**, *48*, 4034-4037.
- [6] Z. Chen et al. *Biosensors and Bioelectronics* **91** (2017) 553–559.
- [7] Y. Zou, J. H. Xiao, Z. C. Tu, Y. Y. Zhang, K. Yao, M. H. Luo, K. Ding, Y. H. Zhang and Y. S. Lai, *Bioorg. Med. Chem. Lett.* **2016**, *26*, 3052-3059.

**Table S3. Protein hits identified by LC-MS/MS with IB-4 in the presence or absence of its competitor Ibrutinib. “NaN” means “not available”.**

| Protein names                                                                           | Gene names  | Mol.weight<br>[kDa] | SILAC ratios(IB-4/IB-4+IB) |         |        | SILAC ratios(IB-4/DMSO) |         |         |
|-----------------------------------------------------------------------------------------|-------------|---------------------|----------------------------|---------|--------|-------------------------|---------|---------|
|                                                                                         |             |                     | 1                          | 2       | 3      | 1                       | 2       | 3       |
| Tyrosine-protein kinase BTK;Non-specific protein-tyrosine kinase                        | BTK         | 76.28               | 10.57                      | 10.415  | 9.6632 | 12.972                  | 12.066  | 13.386  |
| Non-specific protein-tyrosine kinase;Tyrosine-protein kinase Blk                        | BLK         | 49.75               | NaN                        | NaN     | 8.0766 | 12.493                  | 11.923  | 11.553  |
| 60S ribosomal protein L35a                                                              | RPL35A      | 10.645              | NaN                        | 0.91728 | 1.4091 | NaN                     | NaN     | NaN     |
| Acetyl-CoA carboxylase 1;Biotin carboxylase;Acetyl-CoA carboxylase 2;Biotin carboxylase | ACACA;ACACB | 265.55              | 1.3962                     | 1.563   | 1.3726 | 1.2368                  | 1.1333  | 1.1701  |
| Serine/arginine-rich splicing factor 7                                                  | SRSF7       | 27.366              | 1.4047                     | 1.4517  | 1.3454 | 0.96801                 | 0.99183 | 1.0796  |
| Polypyrimidine tract-binding protein 1;Polypyrimidine tract-binding protein 3           | PTBP1;PTBP3 | 9.1322              | NaN                        | NaN     | 1.3231 | 1.8961                  | 0.89069 | 1.6815  |
| Dihydropyrimidinase-related protein 5                                                   | DPYSL5      | 20.867              | 1.2653                     | 1.3581  | 1.3194 | 1.3014                  | NaN     | NaN     |
| Pre-mRNA-splicing factor 38B                                                            | PRPF38B     | 52.487              | 1.4863                     | 1.0324  | 1.253  | 1.592                   | 1.2462  | 2.119   |
| Cytochrome b-c1 complex subunit 8                                                       | UQCRQ       | 9.9062              | 1.184                      | 1.0857  | 1.2286 | 1.1137                  | NaN     | NaN     |
| Phosphate carrier protein, mitochondrial                                                | SLC25A3     | 36.161              | NaN                        | 1.0465  | 1.2234 | 1.0599                  | 1.0925  | 1.2136  |
| 60S ribosomal protein L10a                                                              | RPL10A      | 24.831              | 1.0242                     | 1.2184  | 1.2232 | 0.87665                 | 0.89074 | 1.1487  |
| Histone H4                                                                              | HIST1H4A    | 11.367              | 1.1868                     | 1.2035  | 1.2104 | 1.0931                  | 1.0853  | 1.1176  |
| Serine/arginine repetitive matrix protein 1                                             | SRRM1       | 93.435              | 0.97887                    | 1.0008  | 1.1866 | 0.98895                 | 0.91287 | 0.91964 |
| Bcl-2-associated transcription factor 1                                                 | BCLAF1      | 83.231              | 1.2473                     | 1.2182  | 1.1757 | 0.95908                 | 1.0543  | 1.0322  |
| 60S ribosomal protein L22                                                               | RPL22       | 5.0827              | 0.85605                    | 0.95499 | 1.1739 | NaN                     | 1.0618  | 1.2701  |
| RNA-binding protein 39                                                                  | RBM39       | 26.698              | 1.0608                     | 1.0556  | 1.1714 | 1.5666                  | 1.1605  | 0.92441 |
| Transformer-2 protein homolog beta                                                      | TRA2B       | 33.665              | 1.4427                     | 1.3398  | 1.171  | 0.94776                 | 1.0298  | 1.132   |
| Exportin-2                                                                              | CSE1L       | 110.42              | NaN                        | 1.1279  | 1.155  | 1.0217                  | NaN     | 1.0357  |

|                                                                                    |                                                          |        |         |         |        |         |         |         |
|------------------------------------------------------------------------------------|----------------------------------------------------------|--------|---------|---------|--------|---------|---------|---------|
| Probable ATP-dependent RNA helicase DDX5;Probable ATP-dependent RNA helicase DDX17 | DDX5;DDX17                                               | 5.9768 | 1.1059  | 1.2111  | 1.1492 | NaN     | 1.0455  | 1.224   |
| Heterogeneous nuclear ribonucleoprotein U                                          | HNRNPU                                                   | 90.583 | 1.1489  | 1.0888  | 1.1464 | 1.1984  | 0.83652 | 1.0329  |
| 60S ribosomal protein L4                                                           | RPL4                                                     | 47.697 | 1.1897  | 1.1295  | 1.1215 | 1.1367  | 1.0527  | 1.0634  |
| Nucleolin                                                                          | NCL                                                      | 76.613 | 1.0523  | 1.1055  | 1.1188 | 1.075   | 1.0469  | 0.97993 |
| Histone H3;Histone H3.2;Histone H3.1t;Histone H3.3;Histone H3.1;Histone H3.3C      | H3F3B;HIST2H3A; HIST3H3;H3F3A;HIST1H3A;HIST2H3P S2;H3F3C | 14.914 | 1.2291  | 1.2111  | 1.1173 | 1.0326  | 1.0416  | 1.1027  |
| 60S ribosomal protein L15;Ribosomal protein L15                                    | RPL15                                                    | 24.146 | 1.1472  | 1.1216  | 1.1069 | 1.0386  | 1.1179  | 1.0597  |
| Serine/arginine-rich splicing factor 1                                             | SRSF1                                                    | 28.329 | 0.9997  | 0.87112 | 1.1026 | 0.95783 | 0.84696 | 0.91252 |
| 60S ribosomal protein L3;60S ribosomal protein L3-like                             | RPL3;RPL3L                                               | 40.267 | 1.1056  | 1.0767  | 1.0969 | 1.1122  | 0.7794  | 1.0839  |
| 60S ribosomal protein L37;Ribosomal protein L37                                    | RPL37                                                    | 11.078 | 1.0839  | 1.0319  | 1.0968 | 0.97242 | 0.9729  | 1.0009  |
| 60S ribosomal protein L13a                                                         | RPL13a;RPL13A                                            | 16.731 | 1.0863  | 1.1223  | 1.0942 | 1.0938  | 1.0518  | 0.98054 |
| Probable ATP-dependent RNA helicase DDX46                                          | DDX46                                                    | 117.46 | 1.0845  | 1.0755  | 1.0873 | 0.99087 | 0.9622  | 1.1507  |
| Putative high mobility group protein B1-like 1;High mobility group protein B1      | HMGB1;HMGB1P1                                            | 18.311 | 0.93886 | 0.88674 | 1.0845 | 0.80018 | 0.947   | 0.95605 |
| Putative 40S ribosomal protein S26-like 1;40S ribosomal protein S26                | RPS26P11;RPS26                                           | 13.002 | 1.0338  | 1.0716  | 1.0793 | 0.90446 | 0.83081 | 1.1416  |
| 60S ribosomal protein L27a                                                         | RPL27A                                                   | 10.127 | 0.91412 | 0.94522 | 1.0762 | NaN     | 0.89611 | 0.80051 |
| 60S ribosomal protein L18a                                                         | RPL18A                                                   | 16.714 | 1.1454  | 1.0731  | 1.0758 | 1.1279  | 1.0729  | 0.94447 |
| Luc7-like protein 3                                                                | LUC7L3                                                   | 58.22  | 1.153   | 1.1384  | 1.0705 | 1.0858  | 1.1637  | 1.0827  |
| Heat shock cognate 71 kDa protein                                                  | HSPA8                                                    | 68.805 | 1.0732  | 1.0967  | 1.0646 | 1.1716  | 1.1521  | 1.0649  |
|                                                                                    | C11orf98                                                 | 14.234 | 1.0917  | 1.0809  | 1.0635 | 1.0747  | 1.0705  | 1.0028  |
| 60S ribosomal protein L35                                                          | RPL35                                                    | 14.551 | 0.98799 | 0.96313 | 1.0604 | 1.0637  | 0.96515 | 1.0429  |

|                                                                                                 |                 |        |         |         |        |         |         |         |
|-------------------------------------------------------------------------------------------------|-----------------|--------|---------|---------|--------|---------|---------|---------|
| 40S ribosomal protein S8                                                                        | RPS8            | 21.879 | 1.0885  | 1.0513  | 1.0562 | 1.0507  | 1.0596  | 1.0927  |
| 60S ribosomal protein L6                                                                        | RPL6            | 32.728 | 1.0211  | 1.0545  | 1.0557 | 1.0163  | 0.99919 | 1.0415  |
| L-lactate dehydrogenase B chain;L-lactate dehydrogenase                                         | LDHB            | 36.638 | 0.94539 | 1.0429  | 1.0543 | 1.0342  | 0.92971 | 0.9955  |
| 60S ribosomal protein L36                                                                       | RPL36           | 12.254 | 1.0467  | 1.0853  | 1.0536 | 1.0303  | 1.0939  | 1.0535  |
| 60S ribosomal protein L34                                                                       | RPL34           | 13.293 | 1.0044  | 1.0655  | 1.0529 | 1.0175  | 1.0354  | 1.0162  |
| 40S ribosomal protein S2                                                                        | RPS2            | 21.154 | 0.91212 | 1.0342  | 1.0469 | 0.8542  | 1.0004  | 0.99841 |
| Heat shock protein HSP 90-beta                                                                  | HSP90AB1        | 83.263 | 1.0933  | 1.109   | 1.0466 | 1.1309  | 1.1169  | 1.1737  |
| 60S ribosomal protein L28                                                                       | RPL28           | 15.747 | 1.0131  | 1.0358  | 1.0435 | 1.0637  | 0.98026 | 1.026   |
| Heterogeneous nuclear ribonucleoprotein K                                                       | HNRNPK          | 50.976 | 0.85794 | 1.0519  | 1.0429 | 2.4962  | 0.85541 | 1.1624  |
| 60 kDa heat shock protein, mitochondrial                                                        | HSPD1           | 61.054 | 0.88835 | 1.2076  | 1.0421 | 1.1183  | 0.90089 | 1.0819  |
| Serine/arginine-rich splicing factor 6;Serine/arginine-rich splicing factor 4                   | SRSF6;SRSF4     | 39.586 | 1.2769  | 1.1242  | 1.04   | 1.0586  | 0.94964 | 0.95153 |
| 60S ribosomal protein L13                                                                       | RPL13           | 24.261 | 1.0164  | 1.0113  | 1.0384 | 1.0223  | 0.96713 | 1.0199  |
| 60S ribosomal protein L31                                                                       | RPL31           | 14.463 | 1.0171  | 0.98944 | 1.0292 | 1.0221  | 1.0139  | 0.98353 |
| 60S ribosomal protein L32                                                                       | RPL32           | 17.962 | 1.0056  | 1.0288  | 1.0274 | 1.027   | 0.97743 | 1.0432  |
| 40S ribosomal protein S16                                                                       | RPS16;ZNF90     | 11.075 | NaN     | 0.87628 | 1.0254 | NaN     | 0.94205 | 1.0818  |
| Serine/arginine-rich splicing factor 3                                                          | SRSF3           | 10.32  | 0.98923 | 1.0198  | 1.0226 | 0.93686 | 0.89144 | 0.94022 |
| 40S ribosomal protein S6                                                                        | RPS6            | 28.68  | 0.93125 | 0.96818 | 1.0193 | 0.98051 | 0.97741 | 1.1315  |
| 40S ribosomal protein S25                                                                       | RPS25           | 13.742 | 1.0085  | 0.96084 | 1.0136 | 1.1493  | 0.99507 | 1.1312  |
| Ribosomal protein L19;60S ribosomal protein L19                                                 | RPL19           | 23.134 | 0.88246 | 0.96151 | 1.0074 | 1.0184  | 0.93435 | 1.0227  |
| 60S ribosomal protein L18                                                                       | RPL18           | 21.728 | 1.0106  | 1.0132  | 1.0033 | 0.98969 | 1.0015  | 0.97247 |
| Putative elongation factor 1-alpha-like 3;Elongation factor 1-alpha 1;Elongation factor 1-alpha | EEF1A1P5;EEF1A1 | 50.184 | 0.96546 | 0.96091 | 1.0028 | 0.94114 | 0.93441 | 1.0217  |
| Serine/arginine repetitive matrix protein 2                                                     | SRRM2           | 299.61 | 0.9998  | 0.99455 | 1.002  | 1.0265  | 1.0274  | 1.051   |
| 40S ribosomal protein S9                                                                        | RPS9            | 22.591 | 0.97866 | 1.0531  | 1.0011 | 0.94632 | 0.9697  | 1.0056  |

|                                                                                                                                |                          |        |         |         |         |         |         |         |
|--------------------------------------------------------------------------------------------------------------------------------|--------------------------|--------|---------|---------|---------|---------|---------|---------|
| 60S ribosomal protein L21                                                                                                      | RPL21                    | 18.565 | 1.0536  | 1.0008  | 0.99981 | 0.99664 | 1.0684  | 0.92387 |
| Heterogeneous nuclear ribonucleoproteins A2/B1                                                                                 | HNRNPA2B1                | 37.429 | 1.0084  | 1.0122  | 0.99606 | 0.86355 | 0.88407 | 1.0567  |
| Tubulin beta-4B chain;Tubulin beta-4A chain                                                                                    | TUBB4B;TUBB4A            | 49.83  | 0.93572 | 0.94416 | 0.99557 | 1.0048  | 0.98777 | 0.89975 |
| 40S ribosomal protein S23                                                                                                      | RPS23                    | 15.807 | 0.99736 | 0.96976 | 0.99405 | 1.1444  | 1.1179  | 0.908   |
| Phosphoglycerate kinase 1                                                                                                      | PGK1                     | 44.614 | 0.7568  | 0.62583 | 0.99168 | 0.73637 | 0.73753 | 0.82405 |
| Nucleophosmin                                                                                                                  | NPM1                     | 32.575 | 0.99505 | 1.0406  | 0.99102 | 0.94729 | 1.01    | 0.98075 |
| Elongation factor 2                                                                                                            | EEF2                     | 95.337 | 1.0142  | 0.98314 | 0.989   | 0.97982 | 1.0097  | 1.0593  |
| Putative heat shock 70 kDa protein 7;Heat shock 70 kDa protein 6;Heat shock 70 kDa protein 1-like                              | HSPA7;HSPA6;HSPA1L       | 40.244 | 0.94494 | 0.8426  | 0.98821 | 1.0126  | 1.0875  | 1.1743  |
| Heterogeneous nuclear ribonucleoprotein A1;Heterogeneous nuclear ribonucleoprotein A1, N-terminally processed                  | HNRNPA1                  | 33.155 | 0.96661 | 1.0531  | 0.98545 | 0.99201 | 0.92253 | 1.0366  |
| U1 small nuclear ribonucleoprotein 70 kDa                                                                                      | SNRNP70                  | 51.556 | 0.99063 | 1.0152  | 0.98344 | 0.96248 | 0.99    | 0.97895 |
| Serine/arginine-rich splicing factor 2;Serine/arginine-rich splicing factor 8                                                  | SRSF2;SRSF8              | 15.527 | 1.0286  | 0.97443 | 0.98057 | 0.98936 | 0.93688 | 0.94138 |
| 40S ribosomal protein S4, X isoform;40S ribosomal protein S4, Y isoform 2                                                      | RPS4X;RPS4Y2             | 29.597 | 1.0682  | 1.0429  | 0.98052 | 1.2231  | 1.0781  | 1.0031  |
| 60S ribosomal protein L11                                                                                                      | RPL11                    | 20.252 | 0.91033 | 1.0513  | 0.97759 | 0.96104 | 1.0396  | 0.93101 |
| Propionyl-CoA carboxylase alpha chain, mitochondrial                                                                           | PCCA                     | 80.058 | 0.85486 | 0.89575 | 0.97728 | 0.83188 | 0.87548 | 0.93037 |
| 60S ribosomal protein L29                                                                                                      | RPL29                    | 17.752 | 0.97765 | 0.97182 | 0.97663 | NaN     | 0.93606 | 0.91612 |
| 60S ribosomal protein L17                                                                                                      | RPL17;RPL17-C18o<br>rf32 | 19.586 | 1.0115  | 1.0853  | 0.97652 | 0.94633 | 1.0494  | 0.98632 |
| Multifunctional protein ADE2;Phosphoribosylaminoimidazole-succinocarboxamide synthase;Phosphoribosylaminoimidazole carboxylase | PAICS                    | 45.651 | 0.9345  | 1.039   | 0.97539 | 1.0171  | 1.3091  | 1       |
| Plasminogen activator inhibitor 1 RNA-binding protein                                                                          | SERBP1                   | 44.965 | 1.3619  | 1.1331  | 0.97502 | 1.1172  | 1.004   | 1.0593  |

|                                                                                                                                                        |                       |        |         |         |         |         |         |         |
|--------------------------------------------------------------------------------------------------------------------------------------------------------|-----------------------|--------|---------|---------|---------|---------|---------|---------|
| Malate dehydrogenase;Malate dehydrogenase, mitochondrial                                                                                               | MDH2                  | 24.594 | 0.87816 | 0.97527 | 0.97324 | 0.99852 | 0.92898 | 0.94478 |
| L-lactate dehydrogenase A chain                                                                                                                        | LDHA                  | 36.688 | 0.98402 | 0.98156 | 0.97233 | 1.0104  | 1.0112  | 1.0053  |
| 60S ribosomal protein L8                                                                                                                               | RPL8                  | 28.024 | 1.0674  | 1.0908  | 0.96361 | 1.0107  | 1.0118  | 1.0143  |
| 60S ribosomal protein L24                                                                                                                              | RPL24                 | 14.369 | 1.0584  | 1.0183  | 0.96146 | 1.0573  | 0.98533 | 0.99648 |
| 60S ribosomal protein L7                                                                                                                               | RPL7                  | 29.225 | 1.0464  | 1.0149  | 0.96026 | 1.0183  | 1.0097  | 0.9967  |
| Heterogeneous nuclear ribonucleoprotein H2;Heterogeneous nuclear ribonucleoprotein H;Heterogeneous nuclear ribonucleoprotein H, N-terminally processed | HNRNPH1;HNRNP H2      | 11.181 | NaN     | NaN     | 0.95984 | NaN     | NaN     | 1.1399  |
| Transgelin-2                                                                                                                                           | TAGLN2                | 21.086 | 0.90833 | 1.02    | 0.95894 | 0.98651 | 0.94833 | 1.0205  |
| 60S ribosomal protein L10-like;60S ribosomal protein L10                                                                                               | RPL10;RPL10L          | 10.028 | 0.99993 | 0.95353 | 0.95727 | 1.3744  | NaN     | 1.0238  |
| 40S ribosomal protein S14                                                                                                                              | RPS14                 | 16.273 | 1.1058  | 1.0357  | 0.95423 | 0.96904 | 1.0641  | 0.95668 |
| GTP-binding nuclear protein Ran                                                                                                                        | RAN                   | 26.224 | 0.91123 | 0.94072 | 0.95294 | 0.83527 | 0.92793 | 1.0119  |
| Stress-70 protein, mitochondrial                                                                                                                       | HSPA9                 | 6.8096 | 0.99926 | 0.94679 | 0.94837 | 1.1466  | 1.0693  | 1.0367  |
| Putative RNA-binding protein Luc7-like 2                                                                                                               | LUC7L2;C7orf55-LUC7L2 | 46.513 | 0.90799 | 0.98798 | 0.94795 | 0.98649 | 1.0437  | 1.0447  |
| 40S ribosomal protein S3                                                                                                                               | RPS3                  | 17.407 | 1.094   | 0.95613 | 0.94629 | 0.96092 | 0.80536 | 0.95    |
| 14-3-3 protein sigma                                                                                                                                   | SFN                   | 27.774 | NaN     | 0.86083 | 0.94511 | 0.93763 | 0.90921 | 0.914   |
| Elongation factor 1-gamma                                                                                                                              | EEF1G                 | 50.118 | 1.0931  | 1.01    | 0.94044 | 1.0636  | NaN     | 1.2365  |
| Heat shock protein HSP 90-alpha                                                                                                                        | HSP90AA1              | 84.659 | 1.0681  | 0.96486 | 0.92149 | 0.9146  | 1.0501  | 1.0233  |
| Putative 60S ribosomal protein L39-like 5;60S ribosomal protein L39                                                                                    | RPL39P5;RPL39         | 6.3225 | 0.89129 | 0.88864 | 0.91371 | 0.92119 | 1.1358  | 0.8538  |
| Fructose-bisphosphate aldolase;Fructose-bisphosphate aldolase A                                                                                        | ALDOA                 | 39.817 | 0.91151 | 0.94598 | 0.91139 | 0.84347 | 0.89765 | 0.9362  |

|                                                                                                                                                                                                                                                               |                                                 |        |         |         |         |         |         |         |
|---------------------------------------------------------------------------------------------------------------------------------------------------------------------------------------------------------------------------------------------------------------|-------------------------------------------------|--------|---------|---------|---------|---------|---------|---------|
| Tubulin alpha-1C chain;Tubulin alpha-3C/D chain;Tubulin alpha-1A chain;Tubulin alpha-1B chain;Tubulin alpha-4A chain;Tubulin alpha-8 chain;Tubulin alpha-3E chain                                                                                             | TUBA1C;TUBA3C;TUBA1A;TUBA1B;TUBA4A;TUBA8;TUBA3E | 57.73  | 0.93778 | 0.9195  | 0.90706 | 0.95027 | 0.94243 | 0.90247 |
| 40S ribosomal protein S13                                                                                                                                                                                                                                     | RPS13                                           | 17.222 | 0.90759 | 0.91278 | 0.89375 | 0.83881 | 0.83132 | 0.89918 |
| 14-3-3 protein gamma;14-3-3 protein gamma, N-terminally processed                                                                                                                                                                                             | YWHAG                                           | 28.302 | 0.89284 | 0.84302 | 0.8881  | 1.011   | 0.92747 | 0.9403  |
| Methylcrotonoyl-CoA carboxylase subunit alpha, mitochondrial                                                                                                                                                                                                  | MCCC1                                           | 80.472 | 0.8991  | 0.90323 | 0.88737 | 1.226   | 1.1619  | 1.1907  |
| Coronin-1A;Coronin                                                                                                                                                                                                                                            | CORO1A                                          | 51.026 | 0.89675 | 0.88492 | 0.88526 | 0.90544 | 0.82587 | 0.89263 |
| Heterogeneous nuclear ribonucleoprotein C-like 4;Heterogeneous nuclear ribonucleoprotein C-like 1;Heterogeneous nuclear ribonucleoprotein C-like 3;Heterogeneous nuclear ribonucleoprotein C-like 2;Heterogeneous nuclear ribonucleoproteins C1/C2            | HNRNPC;HNRNPC L4;HNRNPCL1;HNRNPCL3;HNRNPC L2    | 12.78  | 1.0689  | NaN     | 0.88426 | 0.84072 | NaN     | 0.90384 |
| Transketolase                                                                                                                                                                                                                                                 | TKT                                             | 49.91  | 0.9924  | 0.9271  | 0.87791 | 1.2695  | 0.92269 | 0.98479 |
| 14-3-3 protein beta/alpha;14-3-3 protein beta/alpha, N-terminally processed;14-3-3 protein eta                                                                                                                                                                | YWHAB;YWHAE;YWHAH                               | 8.4284 | 1.0125  | 0.83651 | 0.87034 | 0.91225 | 0.91458 | 0.85058 |
| Actin, cytoplasmic 2;Actin, cytoplasmic 2, N-terminally processed;Actin, cytoplasmic 1;Actin, cytoplasmic 1, N-terminally processed;Actin, alpha skeletal muscle;Actin, alpha cardiac muscle 1;Actin, gamma-enteric smooth muscle;Actin, aortic smooth muscle | ACTG1;ACTB;ACTA1;ACTC1;ACTG2;ACTA2              | 41.792 | 0.85985 | 0.85683 | 0.86869 | 0.87924 | 0.8436  | 0.88154 |
| Voltage-dependent anion-selective channel protein 2                                                                                                                                                                                                           | VDAC2                                           | 30.348 | 1.0928  | 1.022   | 0.8525  | 1.3037  | 1.3645  | 1.4666  |
| Pyruvate kinase;Pyruvate kinase PKM                                                                                                                                                                                                                           | PKM                                             | 53.045 | 0.8613  | 0.87061 | 0.84887 | 0.85679 | 0.82813 | 0.93395 |
| Tubulin beta chain;Tubulin beta-2B chain;Tubulin beta-2A chain                                                                                                                                                                                                | TUBB;TUBB2B;TUBB2A                              | 47.766 | 0.92384 | 0.87288 | 0.8465  | NaN     | 0.95294 | 0.84812 |



|                                                                                                                                                                                                       |                      |        |         |         |         |         |         |         |
|-------------------------------------------------------------------------------------------------------------------------------------------------------------------------------------------------------|----------------------|--------|---------|---------|---------|---------|---------|---------|
| Hornerin                                                                                                                                                                                              | HRNR                 | 282.39 | NaN     | NaN     | 0.84422 | NaN     | NaN     | NaN     |
| Cofilin-1                                                                                                                                                                                             | CFL1                 | 17.865 | 0.83508 | 0.91046 | 0.84197 | 0.95107 | 0.86345 | 0.91991 |
| Macrophage migration inhibitory factor                                                                                                                                                                | MIF                  | 12.476 | 0.90409 | 0.86979 | 0.84038 | NaN     | 0.8152  | NaN     |
| Profilin-1                                                                                                                                                                                            | PFN1                 | 15.054 | 0.8809  | 0.89295 | 0.83147 | 1.0084  | 0.86847 | 0.80498 |
| Plastin-2                                                                                                                                                                                             | LCP1                 | 70.288 | 0.8035  | 0.78569 | 0.83025 | 0.88094 | 0.87851 | 0.85332 |
| Heat shock protein beta-1                                                                                                                                                                             | HSPB1                | 22.782 | 0.81149 | 0.82052 | 0.82379 | 0.90604 | 0.86781 | 0.93319 |
| Aspartate aminotransferase, mitochondrial                                                                                                                                                             | GOT2                 | 47.517 | 1.012   | 0.83328 | 0.81282 | 0.79184 | NaN     | 0.86666 |
| 60S ribosomal protein L7a                                                                                                                                                                             | RPL7A                | 29.995 | 0.93866 | 1.267   | 0.81272 | NaN     | NaN     | NaN     |
| Glyceraldehyde-3-phosphate dehydrogenase                                                                                                                                                              | GAPDH                | 36.053 | 0.82774 | 0.81541 | 0.79971 | 0.86038 | 0.87545 | 0.8965  |
| Heterogeneous nuclear ribonucleoprotein D0                                                                                                                                                            | HNRNPD               | 23.076 | 0.85242 | 1.1165  | 0.79461 | 0.89269 | 0.74401 | 0.94896 |
| 14-3-3 protein zeta/delta                                                                                                                                                                             | YWHAZ                | 5.8626 | 0.82054 | 0.69871 | 0.78754 | 0.9679  | 0.80121 | 0.87974 |
| 14-3-3 protein theta                                                                                                                                                                                  | YWHAQ                | 17.048 | 0.77649 | NaN     | 0.78714 | NaN     | 0.99074 | 1.0453  |
| Peroxiredoxin-1                                                                                                                                                                                       | PRDX1                | 18.976 | 0.70814 | 0.78884 | 0.75303 | 0.82812 | 0.78734 | 0.74517 |
| Arginine/serine-rich coiled-coil protein 2                                                                                                                                                            | RSRC2                | 50.559 | 1.0559  | 0.68397 | 0.70568 | 1.2451  | 0.81878 | 0.99926 |
| Alpha-enolase                                                                                                                                                                                         | ENO1                 | 47.168 | 0.72127 | 0.72782 | 0.69719 | 0.9168  | 0.86168 | 0.88936 |
| 40S ribosomal protein S3a                                                                                                                                                                             | RPS3A                | 14.446 | 1.0496  | 0.93416 | 0.69433 | 1.1714  | 0.94029 | 0.9787  |
| Deoxyuridine 5-triphosphate nucleotidohydrolase, mitochondrial                                                                                                                                        | DUT                  | 14.306 | NaN     | NaN     | 0.67892 | 0.76095 | NaN     | NaN     |
| Ubiquitin-60S ribosomal protein L40;Ubiquitin;60S ribosomal protein L40;Ubiquitin-40S ribosomal protein S27a;Ubiquitin;40S ribosomal protein S27a;Polyubiquitin-B;Ubiquitin;Polyubiquitin-C;Ubiquitin | UBA52;UBB;RPS27A;UBC | 7.1321 | 0.42897 | 0.43721 | 0.46342 | NaN     | 0.53615 | 0.5731  |
| Pinin                                                                                                                                                                                                 | PNN                  | 81.613 | 1.2382  | NaN     | 0.3818  | NaN     | 1.3129  | 0.63668 |

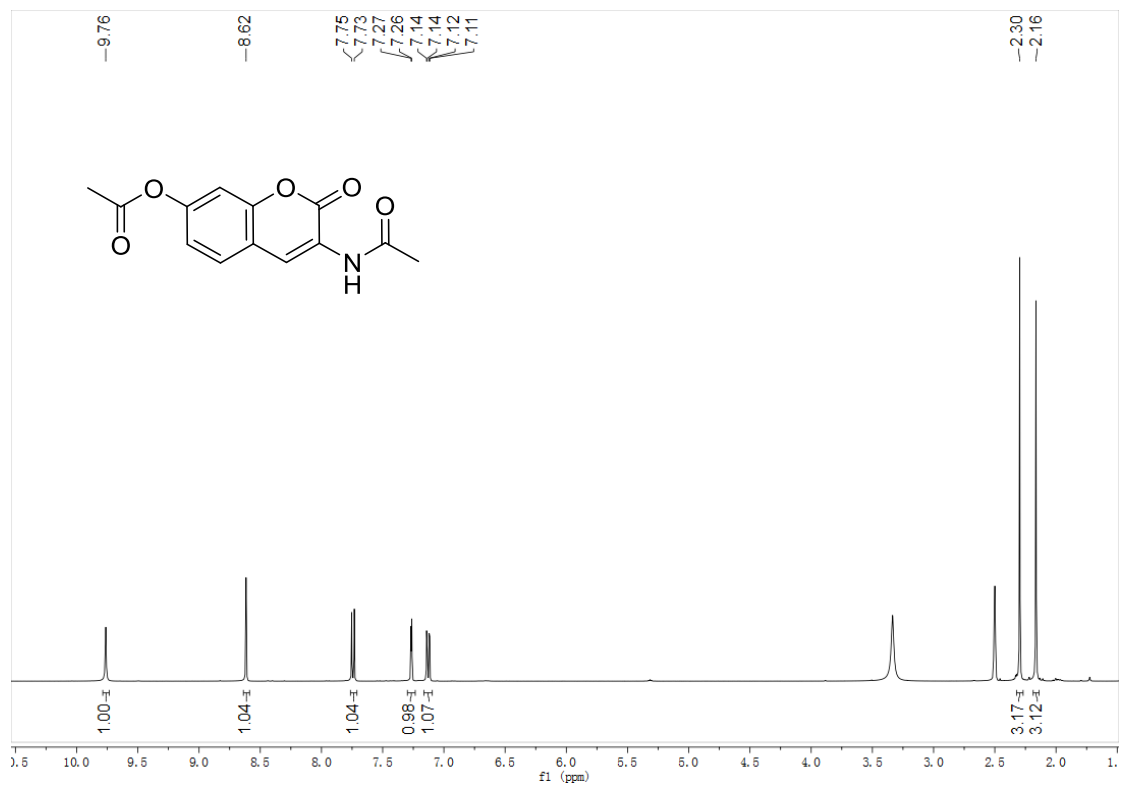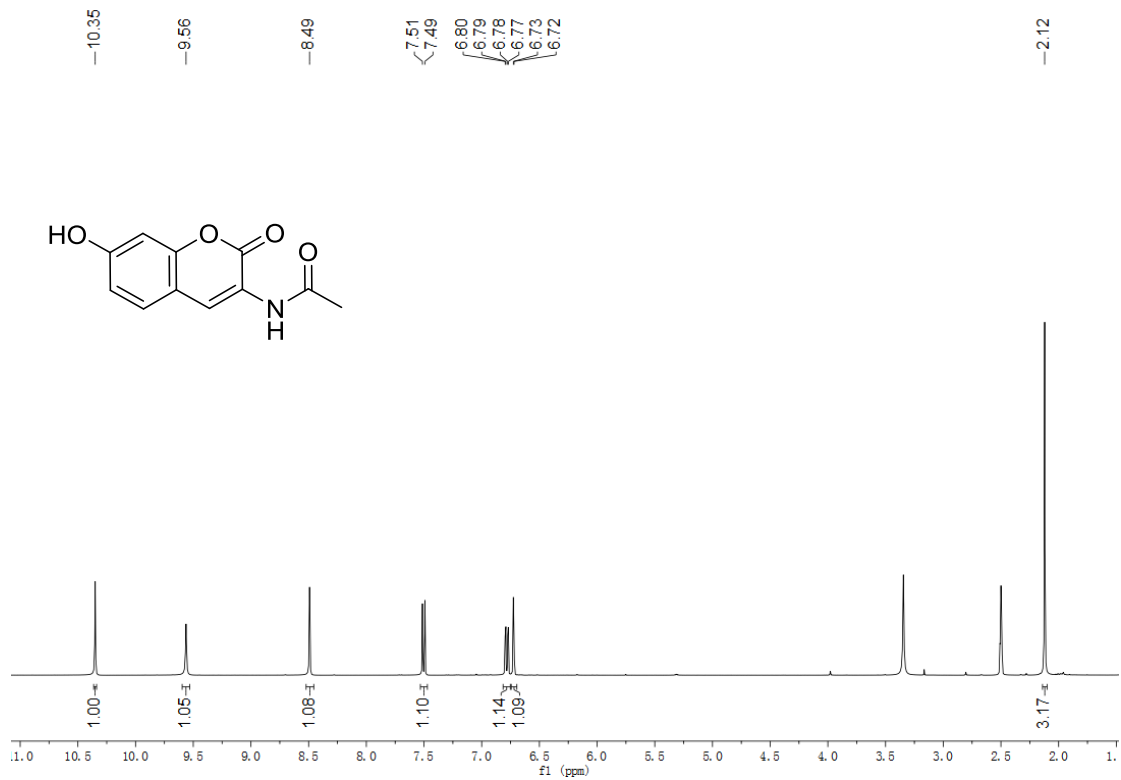

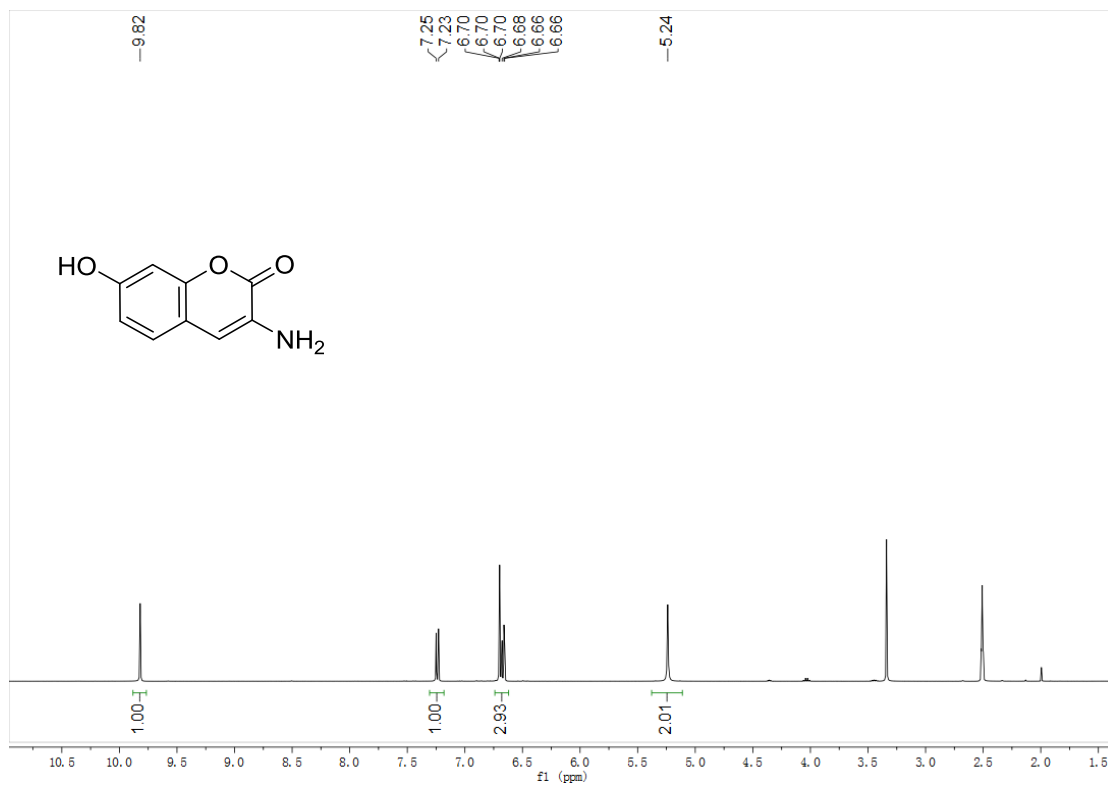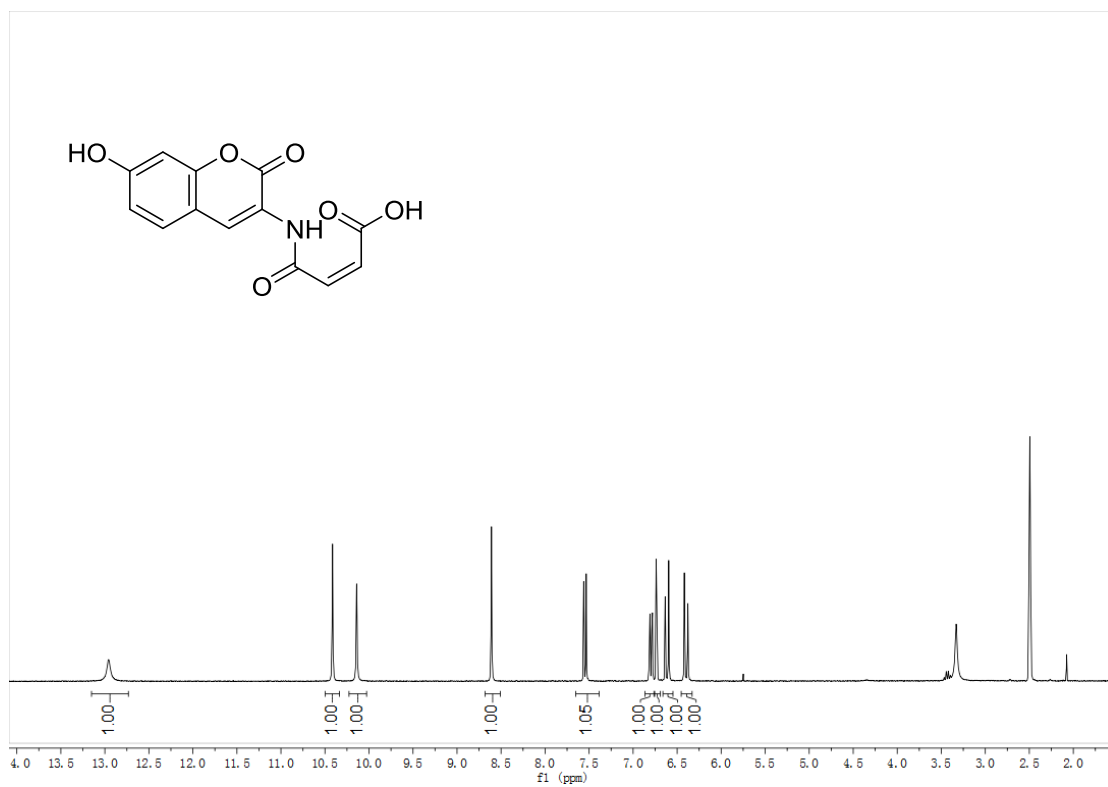

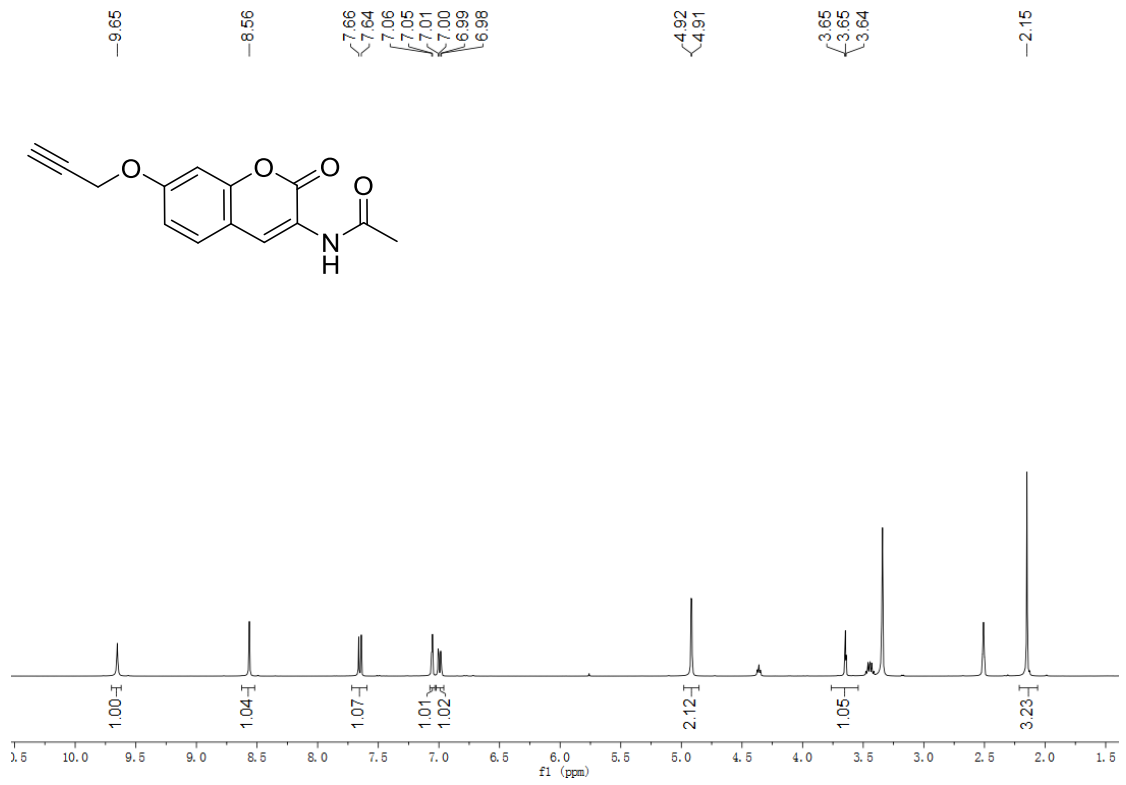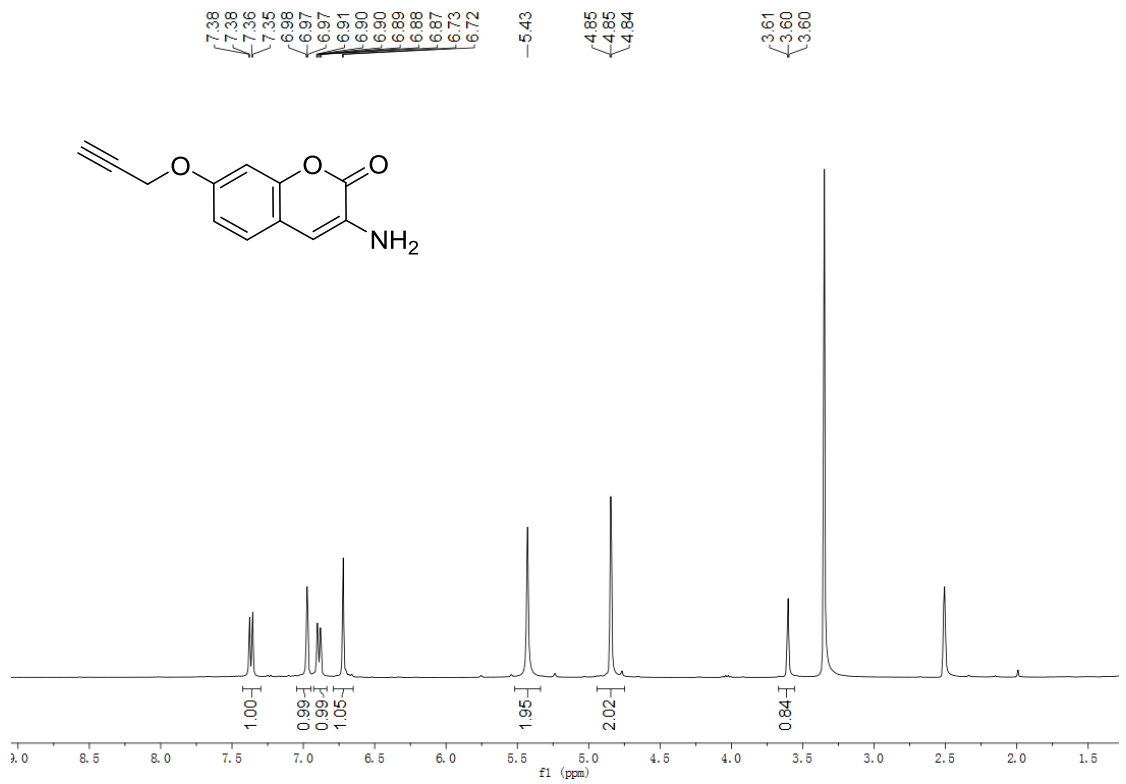

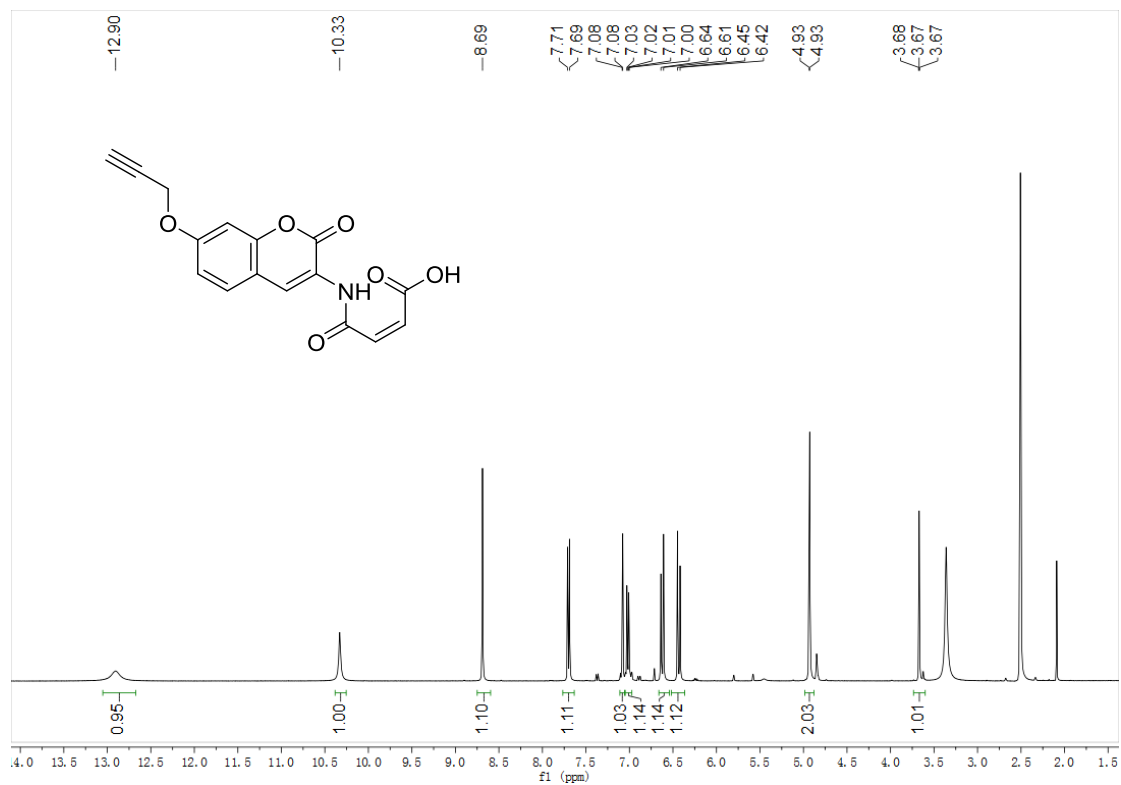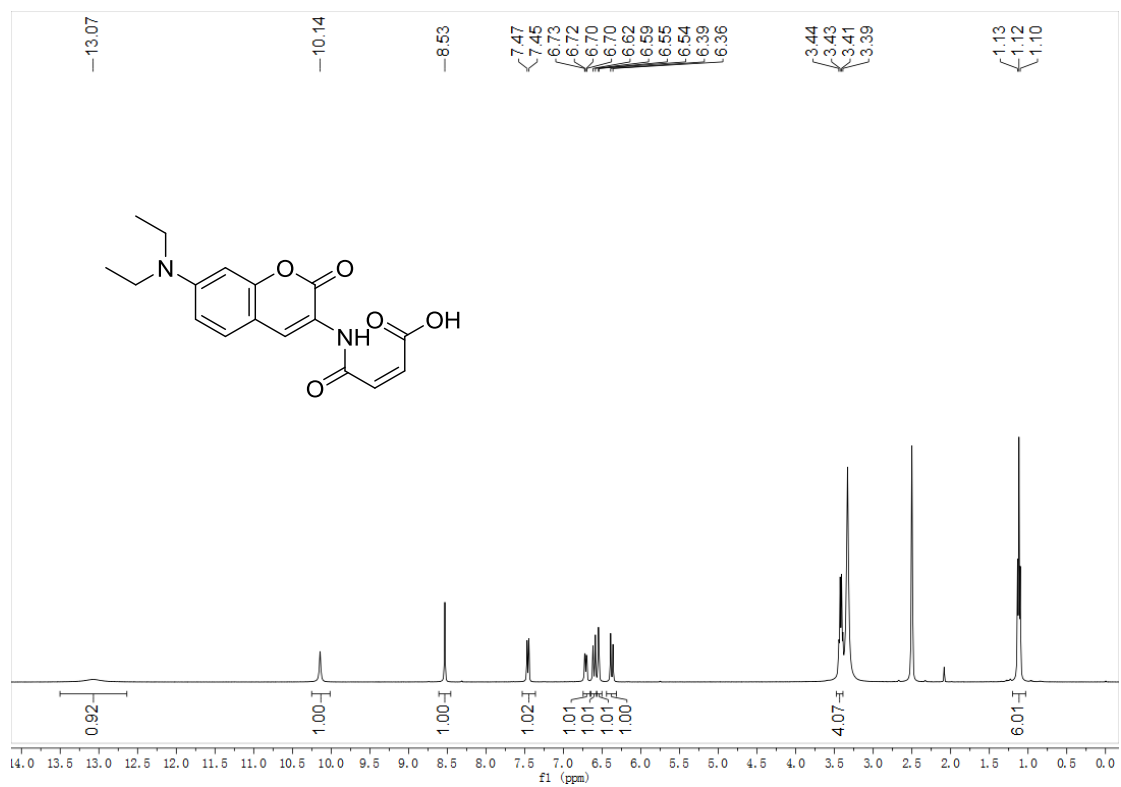

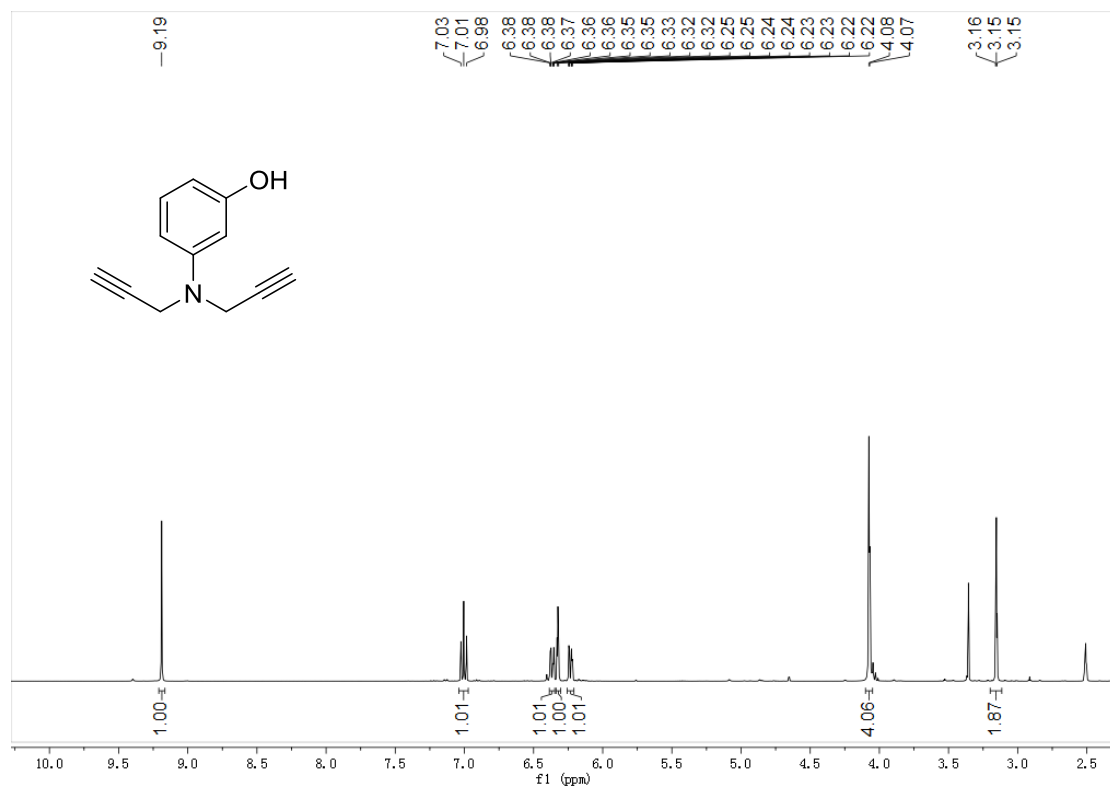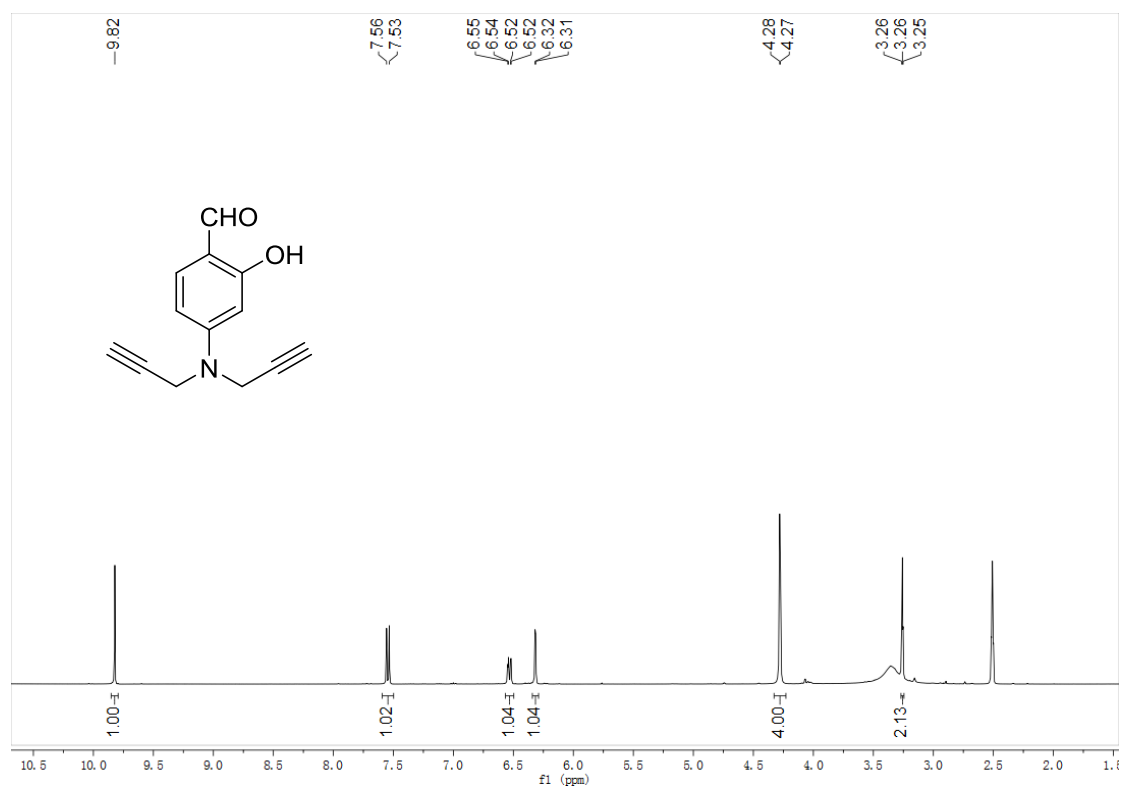

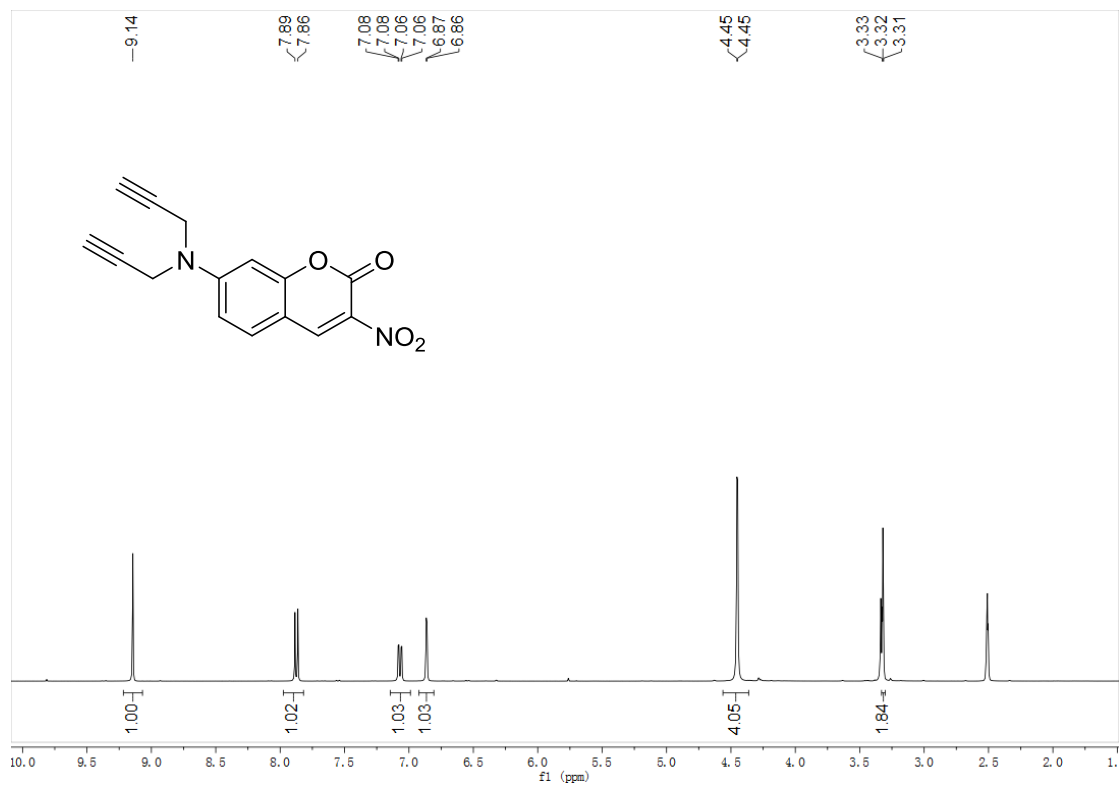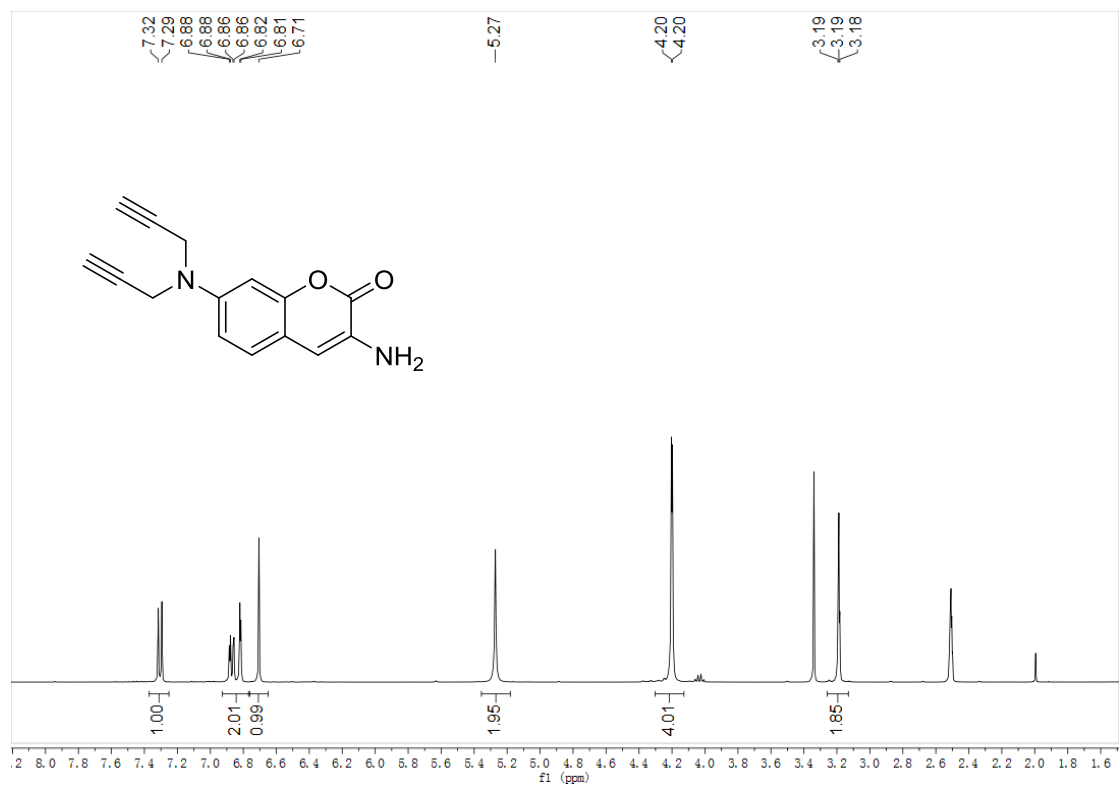

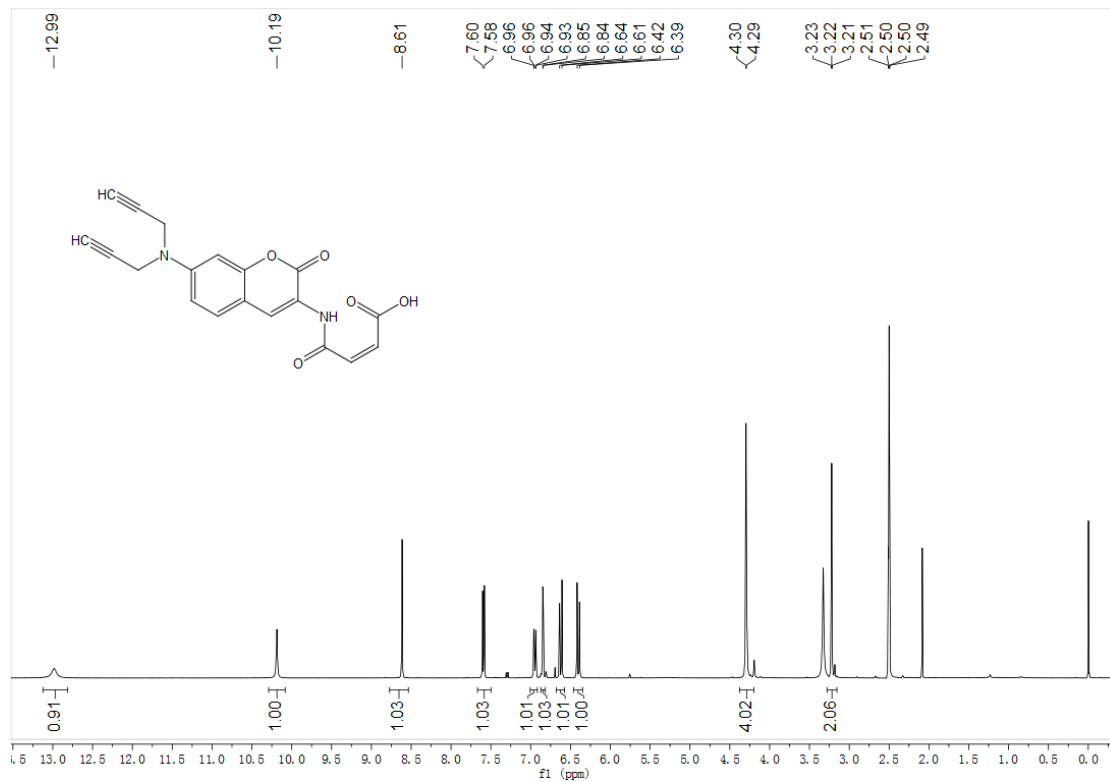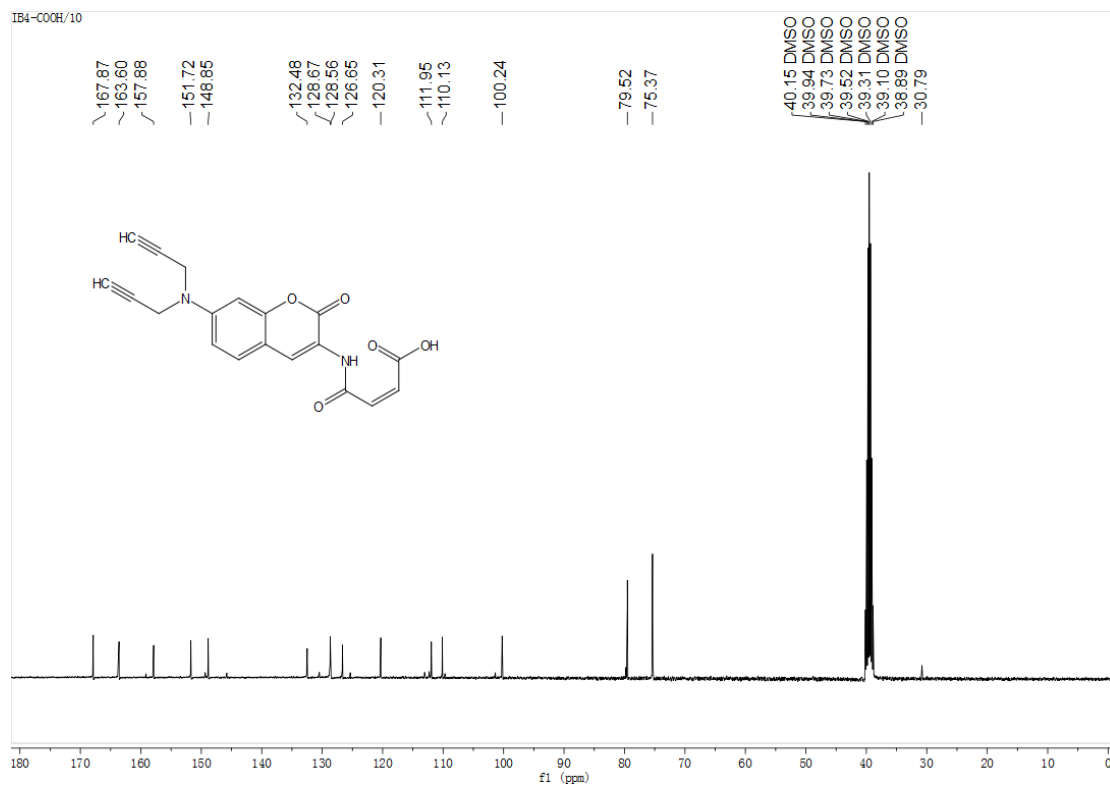



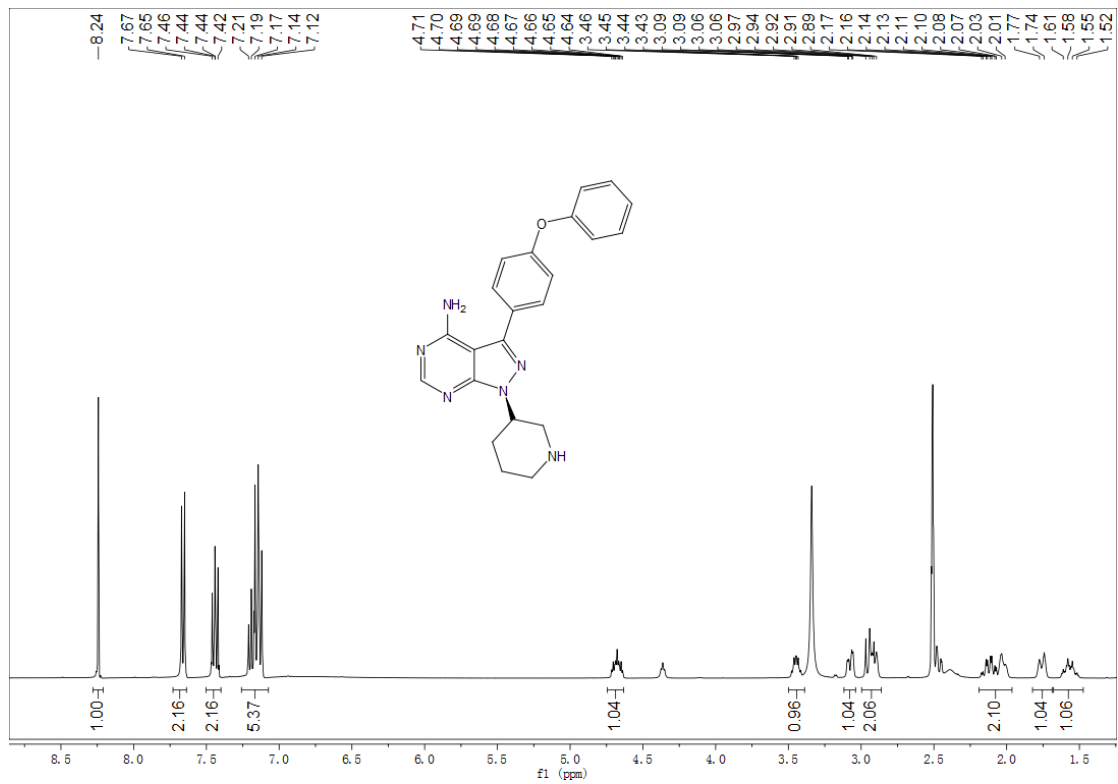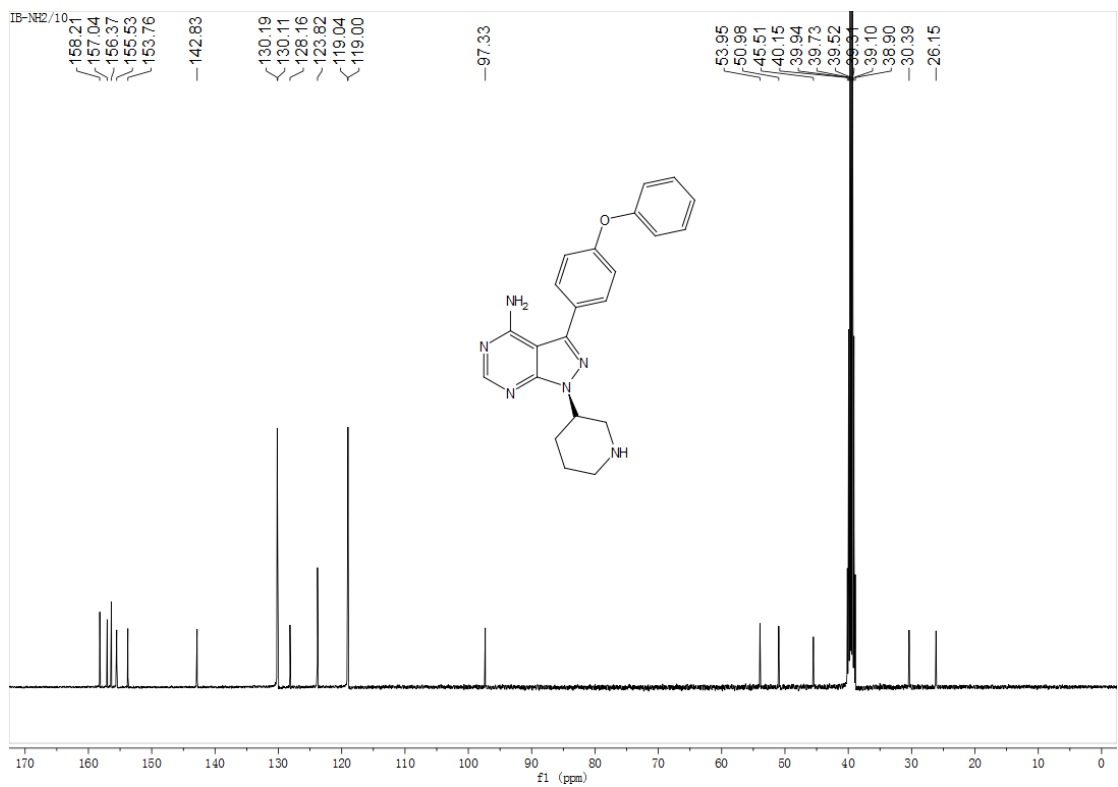

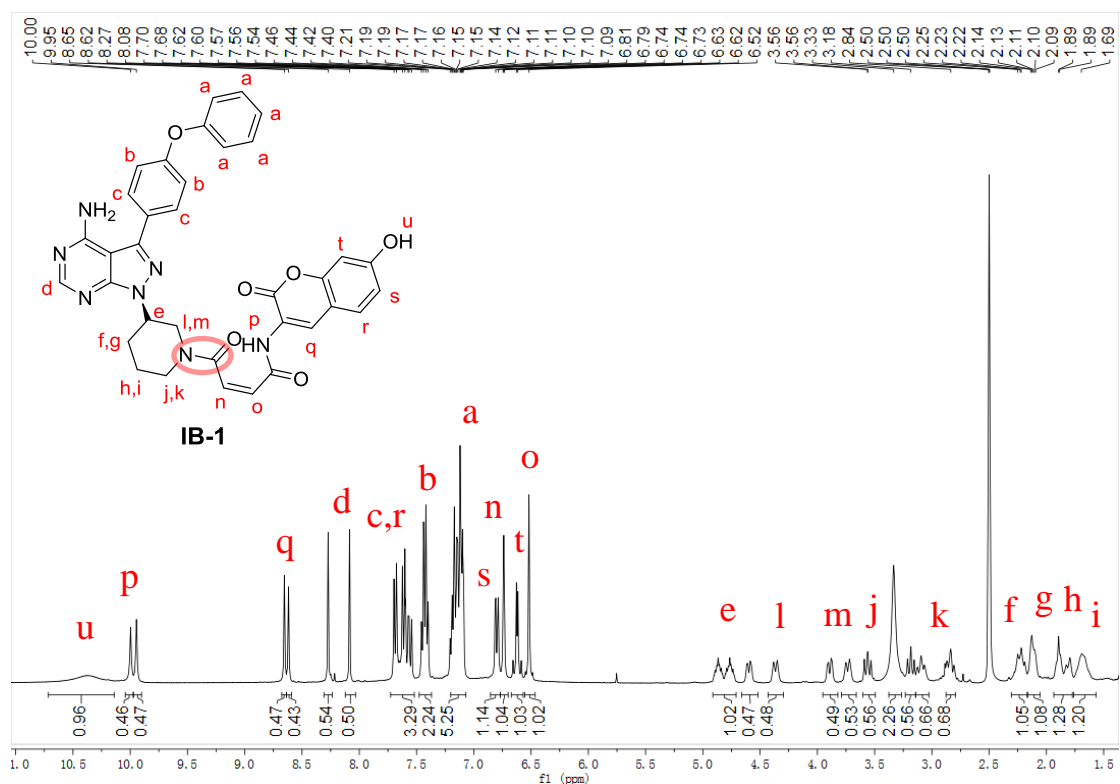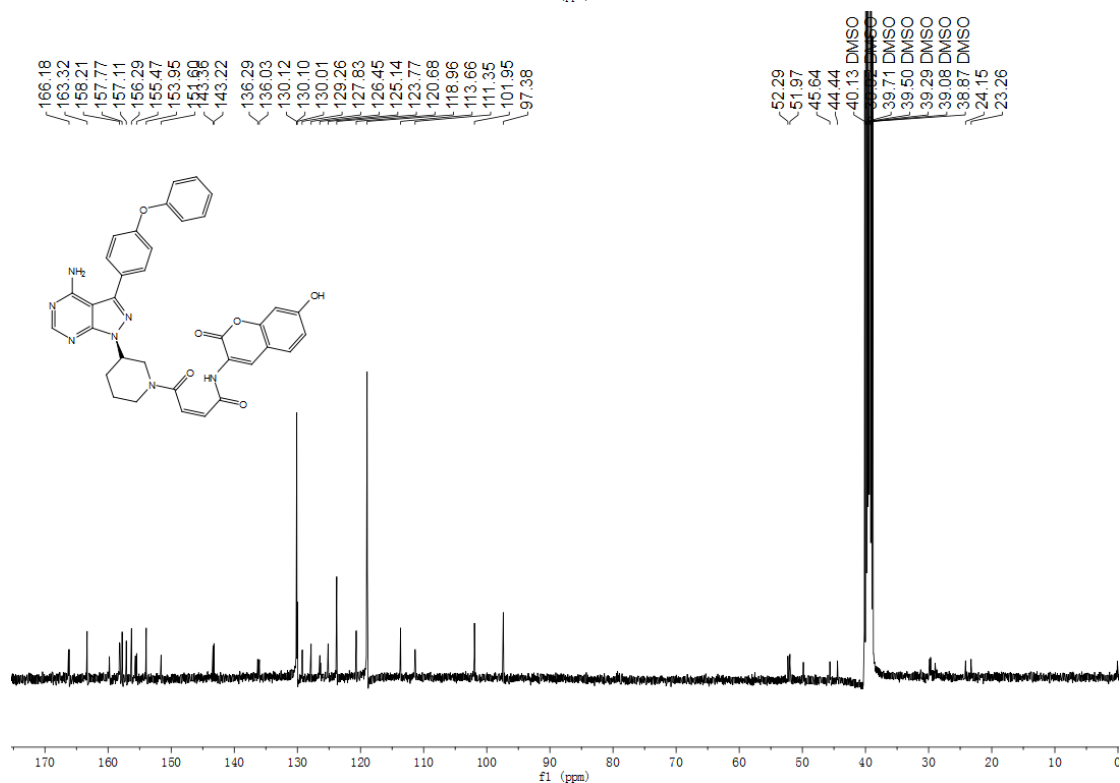

**HPLC analysis of IB-1 (254 nm)**

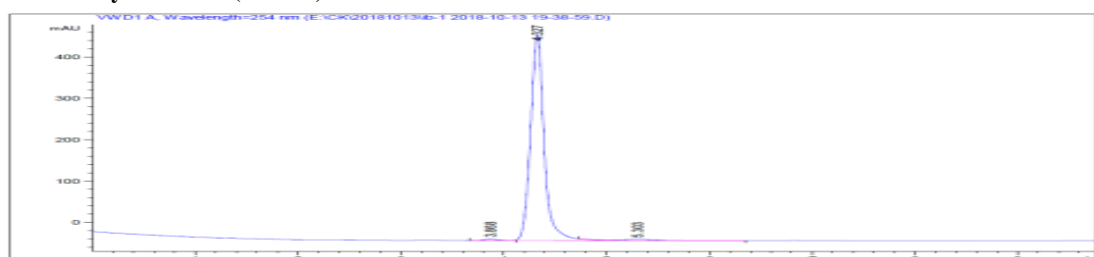

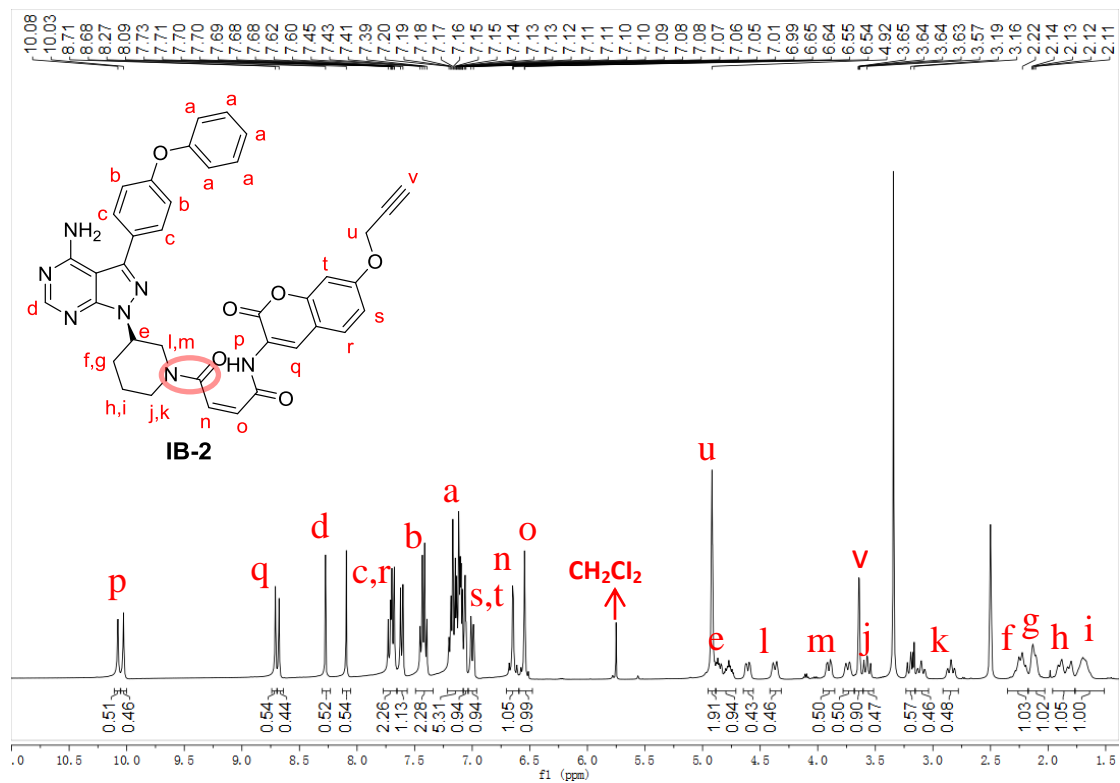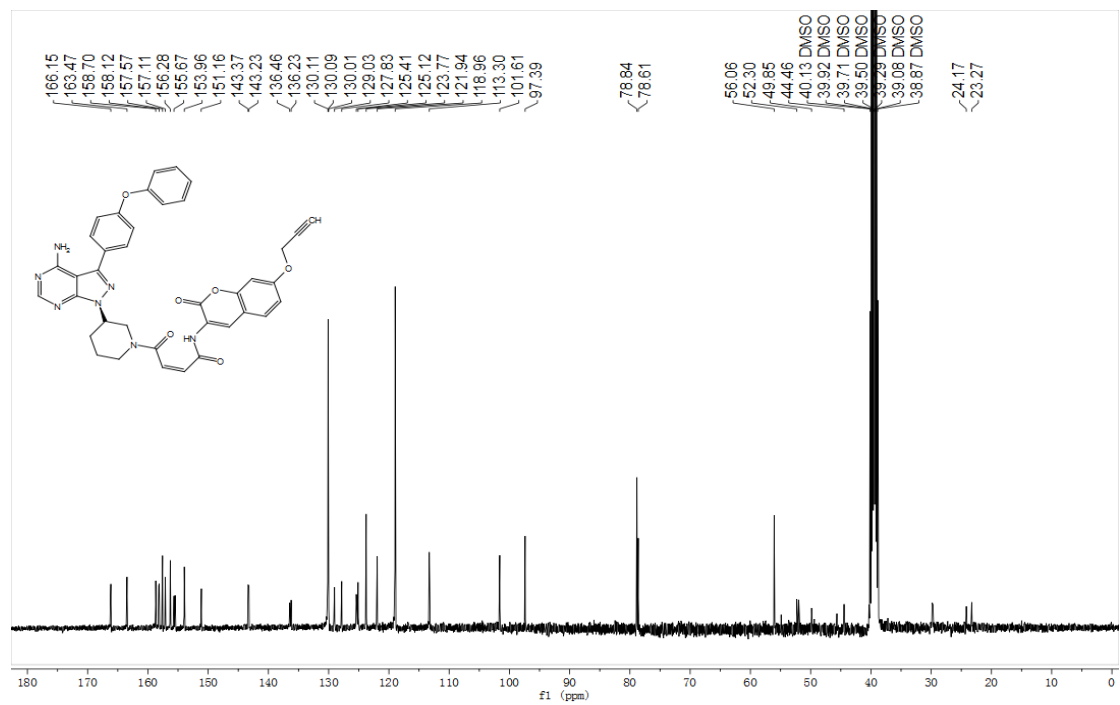

**HPLC analysis of IB-2 (254 nm)**

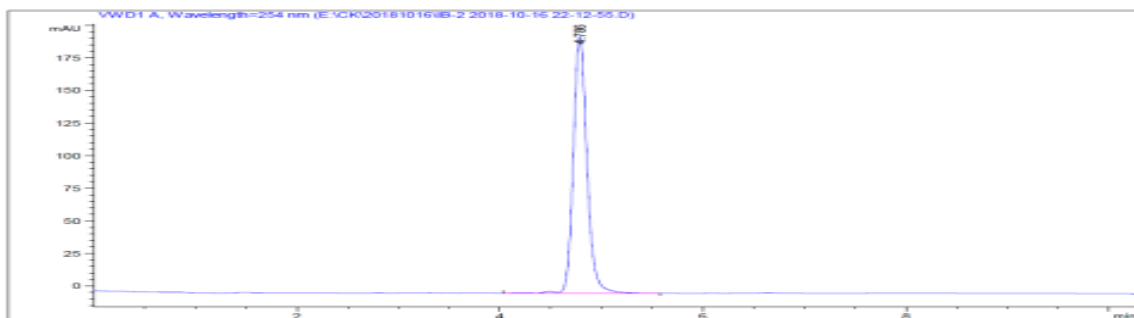

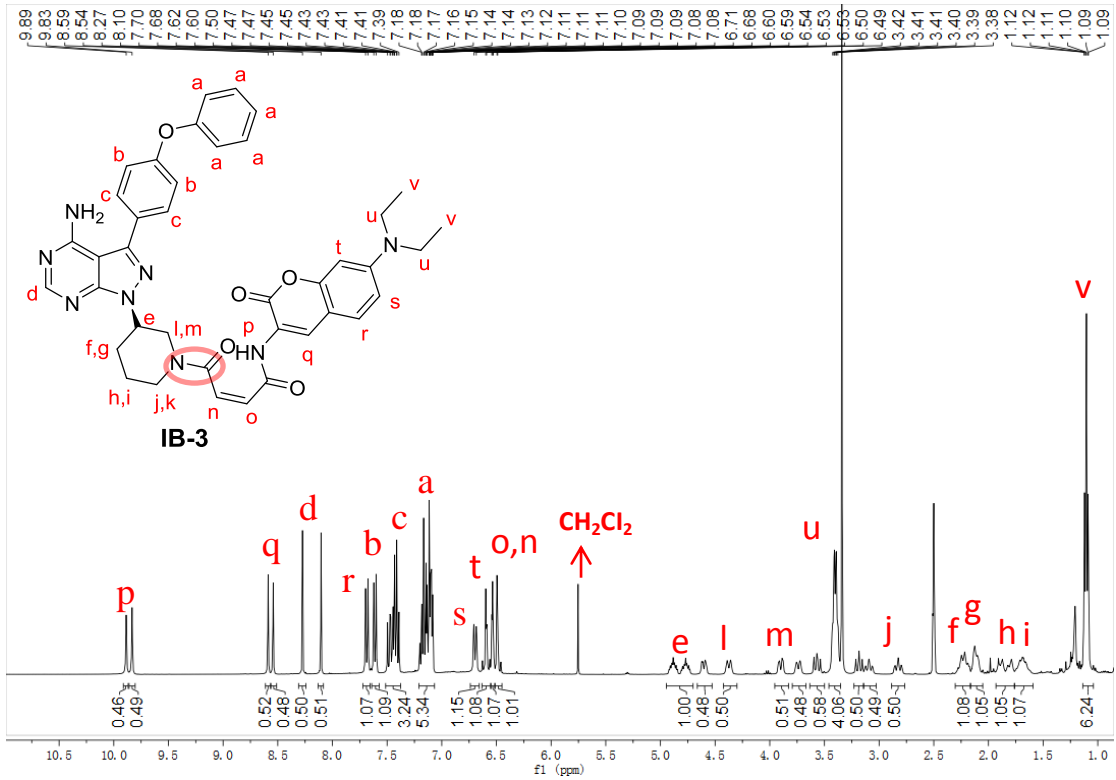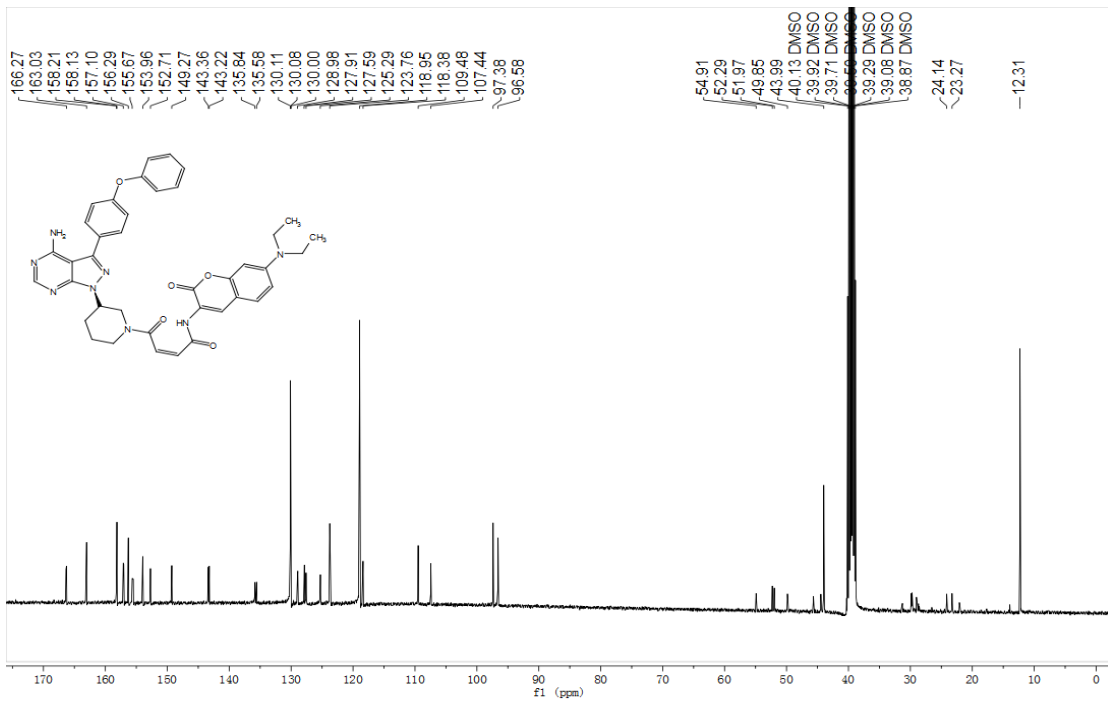

**HPLC analysis of IB-3 (254 nm)**

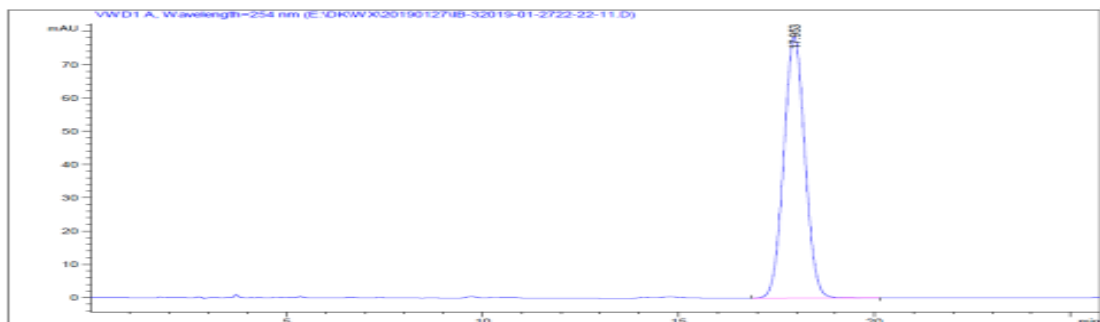

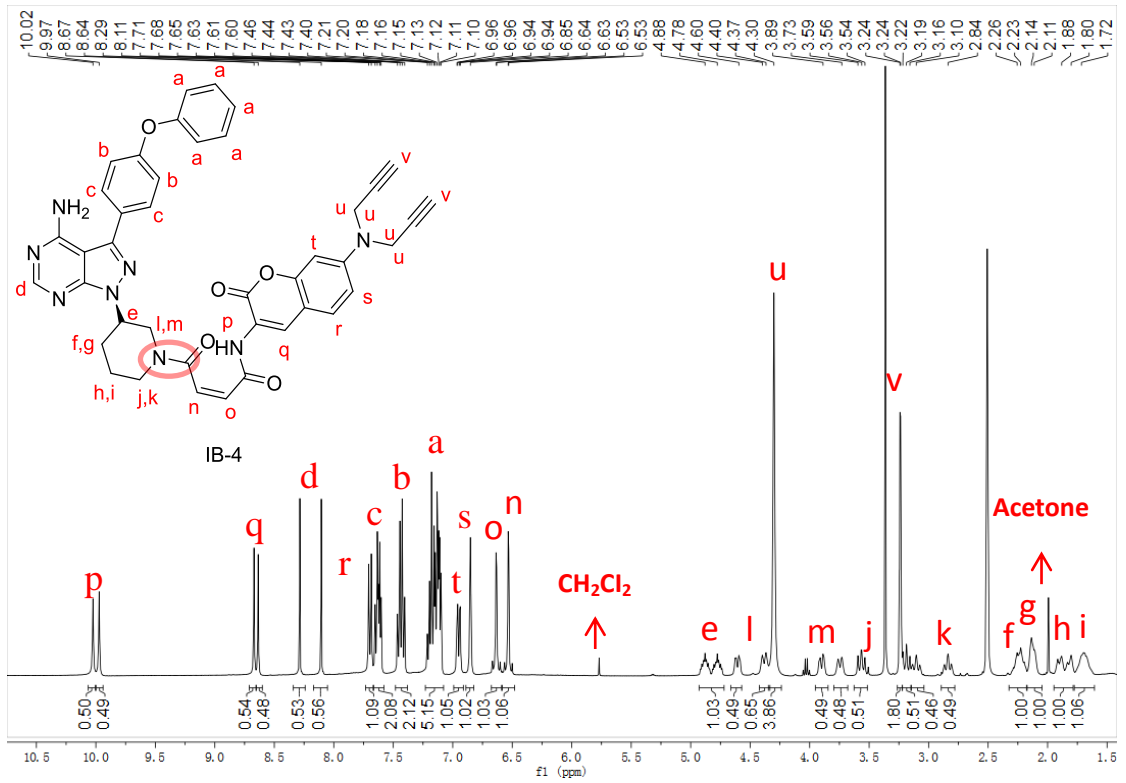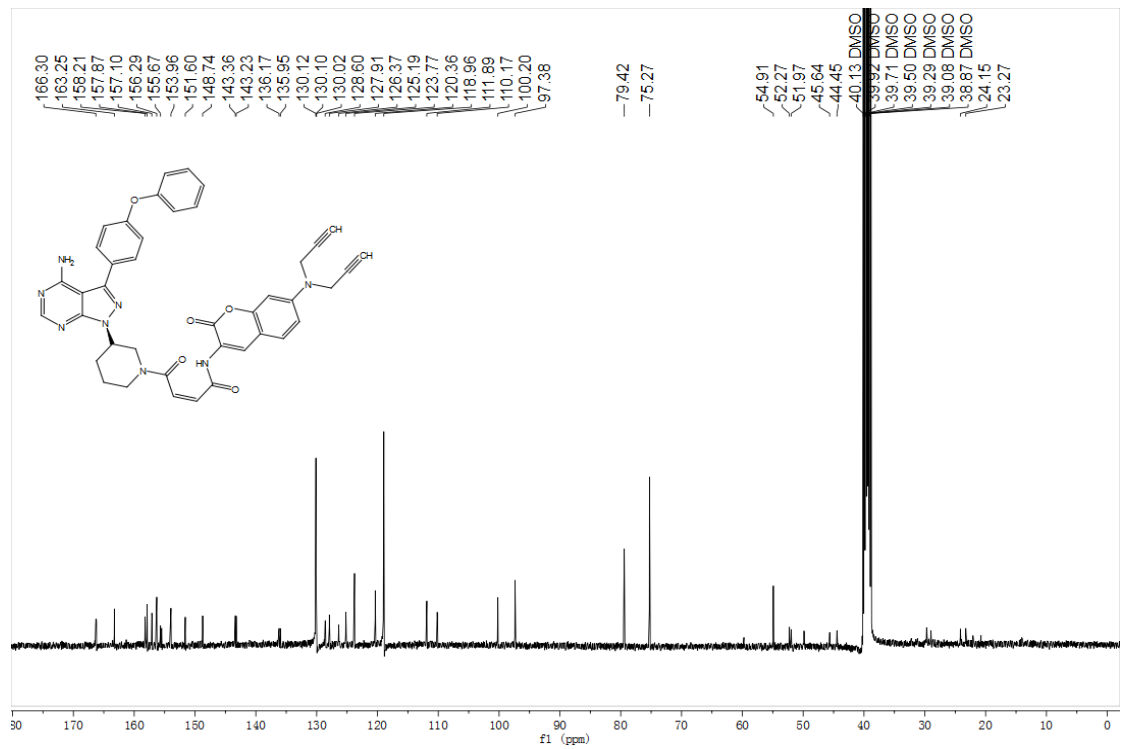

**HPLC analysis of IB-4 (254 nm)**

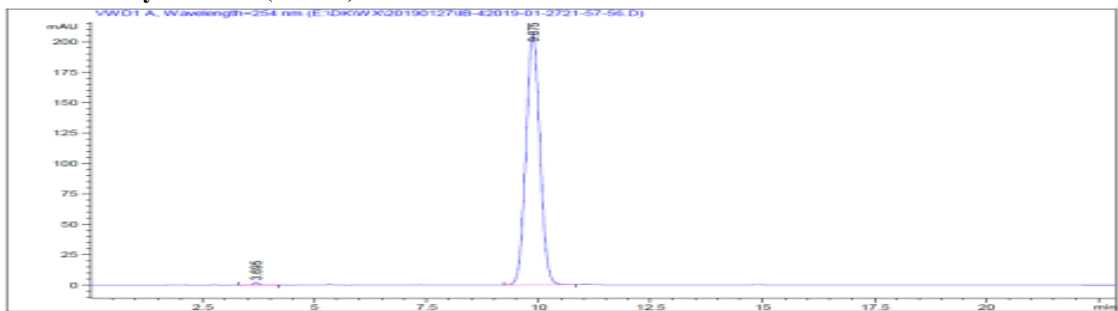

Supplement: c9cc01059a1.pdf [file c9cc01059a1.pdf]
